# Supplementary material
Source: ML conference proceedings conference paper supplement (https://proceedings.neurips.cc/paper_files/paper/2020/hash/0dc23b6a0e4abc39904388dd3ffadcd1-Abstract.html)
Supplement: Supplementary file [file 0dc23b6a0e4abc39904388dd3ffadcd1-Supplemental.pdf]

1 In Appendix A we introduce some basic definitions that are needed for our theoretical results. In  
 2 Appendix B, we provide sufficient conditions for Assumption 1 that were mentioned in the main  
 3 text. In Appendix C and Appendix D we prove the error bounds for PPI and PQI. In Appendix E  
 4 and Appendix F we present more details of our experimental results.

## 5 A Definition of auxiliary MDP and policy projection

6 First we introduce the definition of an auxiliary MDP  $M'$  based on  $M$ : each state in  $M$  has an  
 7 absorbing action which leads to a self-looping absorbing state. All the other dynamics are preserved.  
 8 Rewards are 0 for the absorbing action and unchanged elsewhere. More formally: The auxiliary  
 9 MDP  $M'$  given  $M = \langle \mathcal{S}, \mathcal{A}, R, P, \gamma, \rho \rangle$  is defined as  $M' = \langle \mathcal{S}', \mathcal{A}', R', P', \gamma, \rho \rangle$ , where  
 10  $\mathcal{S}' = \mathcal{S} \cup \{s_{\text{abs}}\}$ ,  $\mathcal{A}' = \mathcal{A} \cup \{a_{\text{abs}}\}$ .  $R'$  and  $P'$  are the same as  $R$  and  $P$  for all  $(s, a) \in \mathcal{S} \times \mathcal{A}$ .  
 11  $R'(s, a)$  if  $s = s_{\text{abs}}$  or  $a = a_{\text{abs}}$  is a point mass on 0, and  $P'(s, a)$  if  $s = s_{\text{abs}}$  or  $a = a_{\text{abs}}$  is a point  
 12 mass on  $s_{\text{abs}}$ . A data set  $D$  generated from distribution  $\mu$  on  $M$  is also from the distribution  $\mu$  on  
 13  $M'$ , since all distributions on  $\mathcal{S} \times \mathcal{A}$  are the same between the two MDPs. This MDP is used only to  
 14 perform our analysis about the error bounds on the algorithm, and is not needed at all for executing  
 15 Algorithm 1 and 2. As some of the notations is actually a function of the MDP, we clarify the usage  
 16 of notation w.r.t.  $M/M'$  in the appendix:

- 17 1. Policy value functions  $V^\pi/Q^\pi$  and Bellman operators  $\mathcal{T}/\mathcal{T}^\pi$  correspond to  $M'$  unless they  
 18 have additional subscripts.
- 19 2. The definition of  $\mathcal{F}$ ,  $\Pi$ ,  $\mathcal{T}_\zeta$ ,  $\mathcal{T}_\zeta^\pi$ ,  $\hat{\mu}$  is independent of the change from  $M$  to  $M'$ .
- 20 3.  $\mu$  is also a distribution over  $\mathcal{S}' \times \mathcal{A}'$ . The definition of  $\zeta$  will be extended to  $\mathcal{S}' \times \mathcal{A}'$  as  
 21 follow:

$$\zeta(s, a) = \begin{cases} \mathbb{1}(\hat{\mu}(s, a) \geq b) & s \in \mathcal{S}, a \in \mathcal{A} \\ 0 & s = s_{\text{abs}} \text{ or } a = a_{\text{abs}} \end{cases}$$

22 (That means there is only one version of  $\mu$  and  $\zeta$  across  $M$  and  $M'$ , instead of like we have  
 23  $\mathcal{T}_{M'}^\pi$  and  $\mathcal{T}_M^\pi$  for  $M$  and  $M'$ .)

24 Recall the definition of semi-norm of any function of state-action pairs. For any function  $g : \mathcal{S}' \times$   
 25  $\mathcal{A}' \rightarrow \mathbb{R}$ ,  $\nu \in \Delta(\mathcal{S}' \times \mathcal{A}')$ , and  $p \geq 1$ , define the shorthand  $\|g\|_{p, \nu} := (\mathbb{E}_{(s, a) \sim \nu}[|g(s, a)|^p])^{1/p}$ . With  
 26 some abuse of notation, later we also use this norm for  $\nu \in \Delta(\mathcal{S} \times \mathcal{A})$  (specifically,  $\mu$ ) by viewing  
 27 the probability of  $\nu$  on additional  $(s, a)$  pairs as zero. Given a policy  $\pi$ , let  $\eta_h^\pi(s)$  be the marginal  
 28 distribution of  $s_h$  under  $\pi$ , that is,  $\eta_h^\pi(s) := \Pr[s_h = s | s_0 \sim p, \pi]$ ,  $\eta_h^\pi(s, a) = \eta_h^\pi(s)\pi(a|s)$ ,  
 29 and  $\eta^\pi(s, a) = (1 - \gamma) \sum_{h=0}^{\infty} \gamma^h \eta_h^\pi(s, a)$ . We also use  $P(s, a)$  and  $P(\nu)$  to denote the next state  
 30 distribution given a state action pair or given the current state action distribution.

31 The norm  $\|\cdot\|_{p, \nu}$  are defined over  $\mathcal{S}' \times \mathcal{A}'$ . Though for the input space of function  $f \in \mathcal{F}$  is  $\mathcal{S} \times \mathcal{A}$ ,  
 32 the norm can still be well-defined. All of the norm would not need the value of  $f(s, a)$  on  $s = s_{\text{abs}}$   
 33 or  $a = a_{\text{abs}}$ , because the distribution does not cover those  $(s, a)$ , or the  $f$  inside of the norm is  
 34 multiplied by other function that is zero for those  $(s, a)$ .

35 We first formally state an obvious result about policy value in  $M$  and  $M'$ .

36 **Lemma 1.** *For any policy  $\pi$  that only have non-zero probability for  $a \in \mathcal{A}$ ,  $v_{M'}^\pi = v_M^\pi$ .*

*Proof.* By the definition of  $M'$ ,  $P$  and  $R$  are the same with  $M$  over  $\mathcal{S} \times \mathcal{A}$ .

$$v_M^\pi = \mathbb{E}_M \left[ \sum_{t=0}^h \gamma^t r_t | s_0 \sim p, \pi \right] = \mathbb{E}_{M'} \left[ \sum_{t=0}^h \gamma^t r_t | s_0 \sim p, \pi \right] = v_{M'}^\pi$$

37 □

38 For the readability we repeat the Definition 1 here

39 **Definition 1** ( $\zeta$ -constrained policy set). *Let  $\Pi_C^{\text{all}}$  be the set of policies  $\mathcal{S} \rightarrow \Delta(\mathcal{A})$  such that*  
 40  $\Pr(\zeta(s, a) = 0 | \pi) \leq \epsilon_\zeta$ . *That is*

$$(1 - \gamma) \sum_{h=0}^{\infty} \gamma^h \mathbb{E}_{s, a \sim \eta_h^\pi} [\mathbb{1}(\zeta(s, a) = 0)] \leq \epsilon_\zeta \quad (4)$$

41 Now we introduce another constrained policy set. Different from  $\zeta$ -constrained policy set which  
 42 we introduced in Definition 1, this policy set is on  $M'$  instead of  $M$  and the policy is forced to take  
 43 action  $a_{\text{abs}}$  when  $\zeta(s, a) = 0$  for all  $a$ . The reason we introduce this is to help us formally analyze the  
 44 (lower bound of) performance of the resulting policy. We essentially treat any action taken outside  
 45 of the support to be  $a_{\text{abs}}$ . Later we will define a projection to achieve that and show results about  
 46 how the policy value changes after projection.

47 **Definition 2** (strong  $\zeta$ -constrained policy set). *Let  $\Pi_{SC}^{\text{all}}$  be the set of all policies  $S' \rightarrow \Delta(\mathcal{A}')$  such  
 48 that for  $\forall (s, a)$   $\pi(a|s) > 0$  then 1)  $\zeta(s, a) > 0$ , or 2)  $a = a_{\text{abs}}$ .*

49 Notice that for  $\zeta$ -constrained policy set we have no requirement for  $\pi$  if for any action  $\zeta(s, a)$  is zero.  
 50 For strong  $\zeta$ -constrained policy set we enforce  $\pi$  to take action  $a_{\text{abs}}$ . The second difference is  $\zeta$ -  
 51 constrained policy set requires the condition holds for  $s, a$  that is reachable, which means  $\eta_h^\pi(s) > 0$   
 52 and  $\pi(a|s) > 0$ . Here we require the same condition holds for any  $s, a$  such that  $\pi(a|s) > 0$ . In  
 53 general, this is a stronger definition. However, we can show that for any policy in  $\zeta$ -constrained  
 54 policy set, it can be mapped to a policy in strong  $\zeta$ -constrained policy set, with changing value  
 55 bounds. Since we only need to change the behavior of policy in the state actions such that the state  
 56 actions that  $\zeta = 0$ , the value of policy will not be much different.

57 Now we define a projection that maps any policy to  $\Pi_{SC}^{\text{all}}$ .

58 **Definition 3** ( $\zeta$ -constrained policy projection).  *$(\Xi\pi)(a|s)$  equals  $\zeta(s, a)\pi(a|s)$  if  $a \in \mathcal{A}$ , and equals  
 59  $\sum_{a' \in \mathcal{A}'} \pi(a'|s)(1 - \zeta(s, a'))$  if  $a = a_{\text{abs}}$*

60 Next we show that the projection of policy will has an equal or smaller value than the original policy.

61 **Lemma 2.** *For any policy  $\pi : S' \rightarrow \Delta(\mathcal{A}')$ ,  $v_{M'}^\pi \geq v_{M'}^{\Xi(\pi)}$ , and  $v_{M'}^\pi = v_{M'}^{\Xi(\pi)}$  if for any  $(s, a)$   
 62 reachable by  $\pi$ ,  $\zeta(s, a) = 1$ .*

63 *Proof.* We drop the subscription of  $M'$  in this proof for ease of notation. For any given  $s$ ,

$$\sum_{a \in \mathcal{A}'} \pi(a|s) Q^{\Xi(\pi)}(s, a) = \sum_{a \in \mathcal{A}} \pi(a|s) Q^{\Xi(\pi)}(s, a) \quad (Q^\pi(s, a_{\text{abs}} = 0))$$

$$\geq \sum_{a \in \mathcal{A}} \zeta(a|s) \pi(a|s) Q^{\Xi(\pi)}(s, a) \quad (5)$$

$$= \Xi(\pi)(a_{\text{abs}}|s) Q^{\Xi(\pi)}(s, a_{\text{abs}}) + \sum_{a \in \mathcal{A}} \Xi(\pi)(a|s) Q^{\Xi(\pi)}(s, a) \quad (\text{Def of } \Xi)$$

$$= \sum_{a \in \mathcal{A}'} \Xi(\pi)(a|s) Q^{\Xi(\pi)}(s, a) \quad (6)$$

$$= V^{\Xi(\pi)}(s) \quad (7)$$

64 The inequality is an equality if for any  $a$  s.t.  $\pi(a|s) > 0$ ,  $\zeta(s, a) = 1$ . By the performance difference  
 65 lemma [3, Lemma 6.1]:

$$v^{\Xi(\pi)} - v^\pi = \sum_{h=0}^{\infty} \gamma^h \mathbb{E}_{s \sim \eta_h^\pi} \left[ V^{\Xi(\pi)}(s) - \sum_{a \in \mathcal{A}'} \pi(a|s) Q^{\Xi(\pi)}(s, a) \right] \leq 0 \quad (8)$$

66 The inequality is an equality if for any  $(s, a)$  s.t.  $\eta_h^\pi(s) \pi(a|s) > 0$  for some  $h$ ,  $\zeta(s, a) = 1$ .  
 67 In another word for any state-action reachable by  $\pi$  ( $\eta_h^\pi(s) > 0$  and  $\pi(a|s) > 0$  for some  $h$ ),  
 68  $\zeta(s, a) = 1$ .  $\square$

69 The following results shows for any policy  $\pi$  in the  $\zeta$ -constrained policy set the projection will not  
 70 change the policy value much.

71 **Lemma 3.** *For any policy  $\pi \in \Pi_C^{\text{all}}$ ,  $v_M^\pi \leq v_M^{\Xi(\pi)} + \frac{\epsilon_\zeta V_{\text{max}}}{1-\gamma}$*

72 *Proof.* Since  $\pi$  only takes action in  $\mathcal{A}$ , by Lemma 1, we have that  $v_M^\pi = v_{M'}^\pi$ . Since  $\pi \in \Pi_C^{\text{all}}$ , we  
 73 have that  $\Pr(\zeta(s, a) = 0 | \pi) \leq \epsilon_\zeta$ , which means that:

$$(1 - \gamma) \sum_{h=0}^{\infty} \gamma^h \mathbb{E}_{s \sim \eta_h^\pi} [\mathbf{1}(\zeta(s, a) = 0)] \leq \epsilon_\zeta \quad (9)$$

74 Thus:

$$v^{\Xi(\pi)} - v^\pi = \sum_{h=0}^{\infty} \gamma^h \mathbb{E}_{s \sim \eta_h^\pi} \left[ V^{\Xi(\pi)}(s) - \sum_{a \in \mathcal{A}'} \pi(a|s) Q^{\Xi(\pi)}(s, a) \right] \quad (10)$$

$$= \sum_{h=0}^{\infty} \gamma^h \mathbb{E}_{s \sim \eta_h^\pi} \left[ V^{\Xi(\pi)}(s) - \sum_{a \in \mathcal{A}'} \pi(a|s) \zeta(s, a) Q^{\Xi(\pi)}(s, a) \right] \quad (11)$$

$$- \sum_{h=0}^{\infty} \gamma^h \mathbb{E}_{s, a \sim \eta_h^\pi} \left[ \mathbf{1}(\zeta(s, a) = 0) Q^{\Xi(\pi)}(s, a) \right] \quad (12)$$

$$\geq \sum_{h=0}^{\infty} \gamma^h \mathbb{E}_{s \sim \eta_h^\pi} \left[ V^{\Xi(\pi)}(s) - \sum_{a \in \mathcal{A}'} \pi(a|s) \zeta(s, a) Q^{\Xi(\pi)}(s, a) \right] \quad (13)$$

$$- V_{\max} \sum_{h=0}^{\infty} \gamma^h \mathbb{E}_{s, a \sim \eta_h^\pi} [\mathbf{1}(\zeta(s, a) = 0)] \quad (14)$$

$$\geq \sum_{h=0}^{\infty} \gamma^h \mathbb{E}_{s \sim \eta_h^\pi} \left[ V^{\Xi(\pi)}(s) - \sum_{a \in \mathcal{A}'} \pi(a|s) \zeta(s, a) Q^{\Xi(\pi)}(s, a) \right] - \frac{V_{\max} \epsilon \zeta}{1 - \gamma} \quad (15)$$

$$= - \frac{V_{\max} \epsilon \zeta}{1 - \gamma} \quad (16)$$

75 The last step follows from the first part in the proof of Lemma 2,  $v_{M'}^\pi - v_{M'}^{\Xi(\pi)} \leq \frac{V_{\max} \epsilon \zeta}{1 - \gamma}$ .  $\square$

## 76 B Justification of Assumption 1

77 In this section we prove a claim stated in Section 5 about the upper bound on density functions. We  
78 are going to prove Assumption 1 holds under when the transition density is bounded.

79 **Lemma 4.** *Let  $p(\cdot|s, a)$  be the probability density function of transition distribution:  $\rho(s_0) \leq \sqrt{U} <$   
80  $\infty$ ,  $p(s_{t+1}|s_t, a_t) \leq \sqrt{U} < \infty$  and  $\forall \pi(a_t|s_t, h) \leq \sqrt{U} < \infty$ , for all  $s_0, s_t, s_{t+1} \in \mathcal{S}$  and  $a \in \mathcal{A}$ .  
81 Then in  $M'$  for any non-stationary policy  $\pi : \mathcal{S} \times \mathbb{N} \rightarrow \Delta(\mathcal{A}')$  and  $h \geq 0$ ,  $\eta_h^\pi(s, a) \leq U$  for any  
82  $s \in \mathcal{S}$  and  $a \in \mathcal{A}$ .*

83 *Proof.* We first prove that  $\eta_h^\pi(s) \leq \sqrt{U}$  for any non-stationary policy  $\pi$ . For  $h = 0$ ,  $\eta_h^\pi(s) = \rho(s) \leq$   
84  $\sqrt{U}$ . For  $h \geq 1$  and  $s \in \mathcal{S}$ :

$$\eta_h^\pi(s) = \int_{s_{-1} \in \mathcal{S}'} \sum_{a \in \mathcal{A}'} \eta_{h-1}^\pi(s_{-1}) \pi(a_{-1}|s_{-1}, h-1) p(s|s_{-1}, a_{-1}) ds_{-1} \quad (17)$$

$$= \int_{s_{-1} \in \mathcal{S}} \sum_{a \in \mathcal{A}} \eta_{h-1}^\pi(s_{-1}) \pi(a_{-1}|s_{-1}, h-1) p(s|s_{-1}, a_{-1}) ds_{-1} \quad (18)$$

$$\leq \mathbb{E}_{\eta_{h-1}^\pi \times \pi(h-1)} [p(s|s_{-1}, a_{-1})] \quad (19)$$

$$\leq \sqrt{U} \quad (20)$$

85 The first step follows from the inductive definition of  $\eta_h^\pi(s)$ . The second step follows from that  $s_{\text{abs}}$  is  
86 absorbing state and  $a_{\text{abs}}$  only leads to absorbing state. The third step follows from transition density  
87  $p(s|s_{-1}, a_{-1})$  is non-negative. The last step follows from that the transition density  $p(s|s_{-1}, a_{-1})$   
88 is the same between  $M$  and  $M'$  for  $s, s_{-1} \in \mathcal{S}$ ,  $a_{-1} \in \mathcal{A}$ , and  $p(s|s_{-1}, a_{-1})$  in  $M$  is upper bounded  
89 by  $U$ . Finally, the joint density function over  $s$  and  $a$   $\eta_h^\pi(s, a) = \eta_h^\pi(s) \pi(a|s, h)$  is bounded by  $U$ ,  
90 and we finished the proof.  $\square$

91 For the convenience of notation later we use *admissible distribution* to refer to state-action distribu-  
92 tions introduced by non-stationary policy  $\pi$  in  $M'$ . This definition is from [1]:

93 **Definition 4** (Admissible distributions). *We say a distribution or its density function  $\nu \in \Delta(\mathcal{S}' \times \mathcal{A}')$*   
94 *is admissible in MDP  $M'$ , if there exists  $h \geq 0$ , and a (non-stationary) policy  $\pi : \mathcal{S}' \times \mathbb{N} \rightarrow \Delta(\mathcal{A}')$ ,*  
95 *such that  $\nu(s, a) = \eta_h^\pi(s, a)$ .*

96 **C Proofs for Policy Iteration Guarantees**

97 In this section we are going to prove the result of Theorem 1 using the definition of the strong  $\zeta$ -  
 98 constrained policy set . At a high level, the proof is done in two steps. First we prove similar result  
 99 to Theorem 1 for any policy in the strong  $\zeta$ -constrained policy set : an upper bound of  $v_{M'}^\pi - v_{M'}^{\pi_t}$ ,  
 100 where  $\pi$  can be any policy in the strong  $\zeta$ -constrained policy set and  $\pi_t$  is the output of the algorithm  
 101 (Theorem 2, formally stated in Appendix C.4). Then we are going to show that for any policy  $\pi$   
 102 in the  $\zeta$ -constrained policy set after a projection  $\Xi$  it is in the strong  $\zeta$ -constrained policy set and  
 103  $v_M^\pi \leq v_M^{\Xi(\pi)} + \frac{V_{\max} \epsilon_\zeta}{1-\gamma}$ . Then we can provide the upper bound for  $v_M^\pi - v_M^{\pi_t}$  for any  $\pi$  in  $\zeta$ -constrained  
 104 policy set .

105 The proof of Theorem 2 (the  $\Pi_{SC}^{all}$  version of Theorem 1, formally stated in Appendix C.4) goes as  
 106 follow. First, we show the fixed point of  $\mathcal{T}_\zeta^\pi$  is  $Q^{\Xi(\pi)}$  for any policy  $\pi$ , indicating the inner loop of  
 107 policy evaluation step is actually evaluating  $\pi_t = \Xi(\hat{\pi}_t)$ . We prove this result formally in Lemma 6.

108 To bound the gap between  $\pi_t$  and any policy  $\tilde{\pi}$  in the  $\zeta$ -constrained policy set , we use the contraction  
 109 property of  $\mathcal{T}_\zeta^\pi$  to recursively decompose it into a discounted summation over policy improvement  
 110 gap  $Q^{\pi_{t+1}} - Q^{\pi_t}$ .  $\tilde{\pi}$  in the  $\zeta$ -constrained policy set is needed because the operator  $\mathcal{T}_\zeta^\pi$  constrains  
 111 the backup on the support set of  $\zeta$ .

Next, we bound the policy improvement gap in Lemma 12:

$$Q^{\pi_{t+1}} - Q^{\pi_t} \geq -\mathcal{O}(\|\zeta(Q^{\pi_t} - f_{t,K})\|_{1,\nu})$$

112 for some admissible distribution  $\nu$  related to  $\pi_{t+1}$ . The fact that we only need to measure the error  
 113 on the support set of  $\zeta$  is important. It follows from the fact that both  $\pi_{t+1}$  and  $\pi_t$  only takes action  
 114 on the support set of  $\zeta$  except  $a_{\text{abs}}$  which gives us a constant value. This allows us to change the  
 115 measure from arbitrary distribution  $\nu$  to data distribution  $\mu$ , *without needing concentratability*.

116 The rest of proof is to upper bound  $\|\zeta(Q^{\pi_t} - f_{t,K})\|_{1,\nu}$  using contraction and concentration inequali-  
 117 ties. First,  $\|\zeta(Q^{\pi_t} - f_{t,K})\|_{1,\nu}$  is upper bounded by  $C\|f_{t,K} - \mathcal{T}_\zeta^\pi f_{t,K}\|_{2,\mu}/(1-\gamma)$  in Lemma 9, using  
 118 a standard contraction analysis technique. Notice that here we can change the measure to  $\mu$  with  
 119 cost  $C$  to allow us to apply concentration inequality. Then Lemma 8 bounds  $\|f_{t,K} - \mathcal{T}_\zeta^\pi f_{t,K}\|_{2,\mu}$   
 120 by a function of sample size  $n$  and completeness error  $\epsilon_{\mathcal{F}}$  using Bernstein's inequality.

121 While writing the proof, we will first introduce the fixed point of  $\mathcal{T}_\zeta^\pi$  is  $Q^{\Xi(\pi)}$  in section C.1. We  
 122 prove the upper bound of the policy evaluation error  $\|\zeta(Q^{\pi_t} - f_{t,K})\|_{1,\nu}$ , in section C.2, and the  
 123 policy improvement step in section C.3. After we proved the main theorem, we will prove when we  
 124 can bound the value gap with the optimal value in Corollary 1, as we showed in the main text.

125 **C.1 Fixed point property**

126 In Algorithm 1, the output policy is  $\hat{\pi}_{t+1}$ . However, we will show that is actually equivalent with  
 the following algorithm,

---

**Algorithm 3** Pessimistic Policy Iteration (PPI, repeat Algorithm 1)

---

**Input:**  $D, \mathcal{F}, \Pi, \hat{\mu}, b$   
**Output:**  $\hat{\pi}_T$   
 Initialize  $\pi_0 \in \Pi$ .  
**for**  $t = 0$  **to**  $T - 1$  **do**  
   Initialize  $f_{t,0} \in \mathcal{F}$   
   **for**  $k = 0$  **to**  $K$  **do**  
     // Policy Evaluation  
      $f_{t,k+1} \leftarrow \arg \min_{f \in \mathcal{F}} \mathcal{L}_D(f, f_{t,k}; \pi_t)$   
   **end for**  
   // Policy Improvement  
    $\hat{\pi}_{t+1} \leftarrow \arg \max_{\pi \in \Pi} \mathbb{E}_D[\mathbb{E}_\pi [\zeta(s, a) f_{t,K}(s, a)]]$   
    $\pi_{t+1} \leftarrow \Xi(\hat{\pi}_{t+1})$   
**end for**

---

127

128 The output policy is still  $\hat{\pi}_{t+1}$ , and we know that  $v^{\hat{\pi}_{t+1}} \geq v^{\pi_{t+1}}$ . So if we can lower bound  $v^{\pi_{t+1}}$   
129 we immediately have the lower bound on  $v^{\hat{\pi}_{t+1}}$ . The only difference in algorithm is we change the  
130 policy evaluation operator from  $\mathcal{T}_\zeta^{\hat{\pi}_t}$  to  $\mathcal{T}_\zeta^{\pi_t}$ , where  $\pi_t$  is the projection of  $\hat{\pi}_t$ . The following result  
131 shows these two operators are actually the same. For the ease of notation, we refer to Algorithm 3  
132 in our analysis.

133 **Lemma 5.** For any policy  $\pi : \mathcal{S}' \rightarrow \Delta(\mathcal{A}')$ ,  $\mathcal{T}_\zeta^\pi = \mathcal{T}_\zeta^{\Xi(\pi)}$ .

134 *Proof.* We only need to prove for any  $f$ ,  $\mathcal{T}_\zeta^\pi f = \mathcal{T}_\zeta^{\Xi(\pi)} f$ . For any  $a \in \mathcal{A}$ ,

$$(\mathcal{T}_\zeta^\pi f)(s, a) = r(s, a) + \gamma \mathbb{E} \left[ \sum_{a' \in \mathcal{A}'} \pi(a'|s') \zeta(s', a') f(s', a') \right] \quad (21)$$

$$= r(s, a) + \gamma \mathbb{E} \left[ \sum_{a' \in \mathcal{A}'} \pi(a'|s') \zeta^2(s', a') f(s', a') \right] \quad (22)$$

$$= r(s, a) + \gamma \mathbb{E}_{s'} \left[ \sum_{a' \in \mathcal{A}'} \Xi(\pi_t)(a'|s') \zeta(s', a') Q^\pi(s', a') \right] \quad (23)$$

$$= (\mathcal{T}_\zeta^{\Xi(\pi)} f)(s, a) \quad (24)$$

135 For  $a = a_{\text{abs}}$ ,  $(\mathcal{T}_\zeta^\pi f)(s, a) = 0 = (\mathcal{T}_\zeta^{\Xi(\pi)} f)(s, a)$ .  $\square$

136 The next result is a key insight about  $\mathcal{T}_\zeta^\pi$ 's behavior in  $M'$  that guide our analysis.

137 **Lemma 6.** For any policy  $\pi : \mathcal{S}' \rightarrow \Delta(\mathcal{A}')$ , the fixed point solution of  $\mathcal{T}_\zeta^\pi$  is equal to  $Q^{\Xi(\pi)}$  on  
138  $\mathcal{S} \times \mathcal{A}$ .

139 *Proof.* By definition  $Q^{\Xi(\pi)}$  is the fixed point of the standard Bellman evaluation operator on  $M'$ :  
140  $\mathcal{T}_{M'}^{\Xi(\pi)}$ . So for any  $(s, a) \in \mathcal{S} \times \mathcal{A}$ :

$$Q^{\Xi(\pi)}(s, a) \quad (25)$$

$$= (\mathcal{T}_{M'}^{\Xi(\pi)} Q^{\Xi(\pi)})(s, a) \quad (26)$$

$$= r(s, a) + \gamma \mathbb{E}_{s'} \left[ \sum_{a' \in \mathcal{A}'} \Xi(\pi)(a'|s') Q^{\Xi(\pi)}(s', a') \right] \quad (27)$$

$$= r(s, a) + \gamma \mathbb{E}_{s'} \left[ \Xi(\pi)(a_{\text{abs}}|s') Q^{\Xi(\pi)}(s', a_{\text{abs}}) + \sum_{a' \in \mathcal{A}'} \Xi(\pi)(a'|s') Q^{\Xi(\pi)}(s', a') \right] \quad (28)$$

$$= r(s, a) + \gamma \mathbb{E}_{s'} \left[ \sum_{a' \in \mathcal{A}'} \Xi(\pi)(a'|s') Q^{\Xi(\pi)}(s', a') \right] \quad (29)$$

$$= r(s, a) + \gamma \mathbb{E}_{s'} \left[ \sum_{a' \in \mathcal{A}'} \pi(a'|s') \zeta(s', a') Q^{\Xi(\pi)}(s', a') \right] \quad (30)$$

$$= (\mathcal{T}_\zeta^\pi Q^{\Xi(\pi)})(s, a) \quad (31)$$

141 So we proved that  $Q^{\Xi(\pi)}$  is also the fixed-point solution of  $\mathcal{T}_\zeta^\pi$  constrained on  $\mathcal{S} \times \mathcal{A}$ .  $\square$

142 An obvious consequences of these two lemmas is that the fixed point solution of  $\mathcal{T}_\zeta^{\pi_t} = \mathcal{T}_\zeta^{\hat{\pi}_t}$  equals  
143  $Q^{\pi_t}$  on  $\mathcal{S} \times \mathcal{A}$ .

144 **C.2 Proofs for policy evaluation step**

145 We start with an useful result of the expected loss of the solution from empirical loss minimization,  
146 by applying a concentration inequality.

147 **Lemma 7.** *Given  $\pi \in \Xi(\Pi)$  and Assumption 3, let  $g_f^* = \arg \min_{g \in \mathcal{F}} \|g - \mathcal{T}_\zeta^\pi f\|_{2,\mu}$ , then  $\|g_f^* -$   
148  $\mathcal{T}_\zeta^\pi f\|_{2,\mu}^2 \leq \epsilon_{\mathcal{F}}$ . The dataset  $D$  is generated i.i.d. from  $M$  as follows:  $(s, a) \sim \mu$ ,  $r = R(s, a)$ ,  
149  $s' \sim P(s, a)$ . Define  $\mathcal{L}_\mu(f; f', \pi) = \mathbb{E}_D [\mathcal{L}_D(f; f', \pi)]$ . We have that  $\forall f \in \mathcal{F}$ , with probability at  
150 least  $1 - \delta$ ,*

$$\mathcal{L}_\mu(\mathcal{T}_{\zeta,D} f; f, \pi) - \mathcal{L}_\mu(g_f^*; f, \pi) \leq \frac{112V_{\max}^2 \ln \frac{|\mathcal{F}||\Pi|}{\delta}}{3n} + \sqrt{\frac{64V_{\max}^2 \ln \frac{|\mathcal{F}||\Pi|}{\delta}}{n}} \epsilon_{\mathcal{F}}$$

151 where  $\mathcal{T}_{\zeta,D}^\pi f = \arg \min_{g \in \mathcal{F}} \mathcal{L}_D(g; f, \pi)$ .

152 *Proof.* This proof is similar with the proof of Lemma 16 in [1], and we adapt it to the  $\zeta$ -constrained  
153 Bellman evaluation operator  $\mathcal{T}_\zeta^\pi$ . First, there is no difference in  $\mathcal{L}_D$  and  $\mathcal{L}_\mu$  between  $M$  and  $M'$ ,  
154 and the right hand side is also the same constant for  $M$  and  $M'$ . The distribution of  $D$  in  $M$  and  $M'$   
155 are the same, since  $\mu$  does not cover  $s_{\text{abs}}$  and  $a_{\text{abs}}$ . So we are going to prove the inequality for  $M$ ,  
156 and thus this bound holds for  $M'$  too.

157 For the simplicity of notations, let  $V_f^\pi(s) = \sum_{a \in \mathcal{A}} \pi(a|s) \zeta(s, a) f(s, a)$ . Fix any  $f, g \in \mathcal{F}$ , and  
158 define

$$X(g, f, g_f^*) := (g(s, a) - r - \gamma V_f^\pi(s'))^2 - (g_f^*(s, a) - r - \gamma V_f^\pi(s'))^2. \quad (32)$$

159 Plugging each  $(s, a, r, s') \in D$  into  $X(g, f, g_f^*)$ , we get i.i.d. variables  
160  $X_1(g, f, g_f^*), X_2(g, f, g_f^*), \dots, X_n(g, f, g_f^*)$ . It is easy to see that

$$\frac{1}{n} \sum_{i=1}^n X_i(g, f, g_f^*) = \mathcal{L}_D(g; f, \pi) - \mathcal{L}_D(g_f^*; f, \pi). \quad (33)$$

161 By the definition of  $\mathcal{L}_\mu$ , it is also easy to show that

$$\mathcal{L}_\mu(g; f, \pi) = \|g - \mathcal{T}_\zeta^\pi f\|_{2,\mu}^2 + \mathbb{E}_{s,a \sim \mu} \left[ \mathbb{V}_{r,s'} \left( r + \gamma \sum_{a' \in \mathcal{A}} \pi(a'|s') \zeta(s', a') f(s', a') \right) \right], \quad (34)$$

162 where  $\mathbb{V}_{r,s'}$  is the variance over conditional distribution of  $r$  and  $s'$  given  $(s, a)$ . Notice that the  
163 second part does not depends on  $g$ . Then

$$\mathcal{L}_\mu(g; f, \pi) - \mathcal{L}_\mu(\mathcal{T}_\zeta^\pi f; f, \pi) = \|g - \mathcal{T}_\zeta^\pi f\|_{2,\mu}^2 \quad (35)$$

164 Then we bound the variance of  $X$ :

$$\begin{aligned} \mathbb{V}[X(g, f, g_f^*)] &\leq \mathbb{E}[X(g, f, g_f^*)^2] \\ &= \mathbb{E}_\mu \left[ \left( (g(s, a) - r - \gamma V_f^\pi(s'))^2 - (g_f^*(s, a) - r - \gamma V_f^\pi(s'))^2 \right)^2 \right] \\ &\hspace{15em} \text{(Definition of } X) \\ &= \mathbb{E}_\mu \left[ (g(s, a) - g_f^*(s, a))^2 (g(s, a) + g_f^*(s, a) - 2r - 2\gamma V_f^\pi(s'))^2 \right] \\ &\leq 4V_{\max}^2 \mathbb{E}_\mu \left[ (g(s, a) - g_f^*(s, a))^2 \right] \\ &= 4V_{\max}^2 \|g - g_f^*\|_{2,\mu}^2 \\ &\leq 8V_{\max}^2 (\mathbb{E}[X(g, f, g_f^*)] + 2\epsilon_{\mathcal{F}}). \end{aligned} \quad (36)$$

165 The last step holds because

$$\begin{aligned}
& \|g - g_f^*\|_{2,\mu}^2 \\
& \leq 2 (\|g - \mathcal{T}_\zeta^\pi f\|_{2,\mu}^2 + \|\mathcal{T}_\zeta^\pi f - g_f^*\|_{2,\mu}^2) \quad ((a+b)^2 \leq 2a^2 + 2b^2) \\
& = 2 (\|g - \mathcal{T}_\zeta^\pi f\|_{2,\mu}^2 - \|\mathcal{T}_\zeta^\pi f - g_f^*\|_{2,\mu}^2 + 2\|\mathcal{T}_\zeta^\pi f - g_f^*\|_{2,\mu}^2) \\
& = 2 [\mathcal{L}_\mu(g; f, \pi) - \mathcal{L}_\mu(\mathcal{T}_\zeta^\pi f; f, \pi)] - (\mathcal{L}_\mu(g_f^*; f, \pi) - \mathcal{L}_\mu(\mathcal{T}_\zeta^\pi f; f, \pi)) + 2\|\mathcal{T}_\zeta^\pi f - g_f^*\|_{2,\mu}^2 \\
& \quad \text{(Equation (35))} \\
& = 2 [\mathcal{L}_\mu(g; f, \pi) - \mathcal{L}_\mu(g_f^*; f, \pi) + 2\|\mathcal{T}_\zeta^\pi f - g_f^*\|_{2,\mu}^2] \\
& = 2 (\mathbb{E}[X(g, f, g_f^*)] + 2\|\mathcal{T}_\zeta^\pi f - g_f^*\|_{2,\mu}^2) \\
& \leq 2(\mathbb{E}[X(g, f, g_f^*)] + 2\epsilon_{\mathcal{F}})
\end{aligned}$$

166 Next, we apply (one-sided) Bernstein's inequality and union bound over all  $f \in \mathcal{F}$ ,  $g \in \mathcal{F}$ , and  
167  $\pi \in \Xi(\Pi)$ . With probability at least  $1 - \delta$ , we have

$$\begin{aligned}
\mathbb{E}[X(g, f, g_f^*)] - \frac{1}{n} \sum_{i=1}^n X_i(f, f, g_f^*) & \leq \sqrt{\frac{2V[X(g, f, g_f^*) \ln \frac{|\mathcal{F}|^2 |\Pi|}{\delta}] + 4V_{\max}^2 \ln \frac{|\mathcal{F}|^2 |\Pi|}{\delta}}{n}} + \frac{4V_{\max}^2 \ln \frac{|\mathcal{F}|^2 |\Pi|}{\delta}}{3n} \\
& = \sqrt{\frac{32V_{\max}^2 (\mathbb{E}[X(g, f, g_f^*)] + 2\epsilon_{\mathcal{F}}) \ln \frac{|\mathcal{F}| |\Pi|}{\delta}}{n}} + \frac{8V_{\max}^2 \ln \frac{|\mathcal{F}| |\Pi|}{\delta}}{3n}. \quad (37)
\end{aligned}$$

Since  $\mathcal{T}_{\zeta,D}^\pi f$  minimizes  $\mathcal{L}_D(\cdot; f, \pi)$ , it also minimizes  $\frac{1}{n} \sum_{i=1}^n X_i(\cdot, f, g_f^*)$ . This is because the two objectives only differ by a constant  $\mathcal{L}_D(g_f^*; f, \pi)$ . Hence,

$$\frac{1}{n} \sum_{i=1}^n X_i(\mathcal{T}_{\zeta,D}^\pi f, f, g_f^*) \leq \frac{1}{n} \sum_{i=1}^n X_i(g_f^*, f, g_f^*) = 0.$$

168 Then,

$$\mathbb{E}[X(\mathcal{T}_{\zeta,D}^\pi f, f, g_f^*)] \leq 0 + \sqrt{\frac{32V_{\max}^2 (\mathbb{E}[X(\mathcal{T}_{\zeta,D}^\pi f, f, g_f^*)] + 2\epsilon_{\mathcal{F}}) \ln \frac{|\mathcal{F}| |\Pi|}{\delta}}{n}} + \frac{8V_{\max}^2 \ln \frac{|\mathcal{F}| |\Pi|}{\delta}}{3n}.$$

169 Solving for the quadratic formula,

$$\begin{aligned}
\mathbb{E}[X(\mathcal{T}_{\zeta,D}^\pi f, f, g_f^*)] & \leq \sqrt{48 \left( \frac{8V_{\max}^2 \ln \frac{|\mathcal{F}| |\Pi|}{\delta}}{3n} \right)^2 + \frac{64V_{\max}^2 \ln \frac{|\mathcal{F}| |\Pi|}{\delta}}{n} \epsilon_{\mathcal{F}} + \frac{56V_{\max}^2 \ln \frac{|\mathcal{F}| |\Pi|}{\delta}}{3n}} \\
& \leq \frac{(56 + 32\sqrt{3})V_{\max}^2 \ln \frac{|\mathcal{F}| |\Pi|}{\delta}}{3n} + \sqrt{\frac{64V_{\max}^2 \ln \frac{|\mathcal{F}| |\Pi|}{\delta}}{n} \epsilon_{\mathcal{F}}} \\
& \quad (\sqrt{a+b} \leq \sqrt{a} + \sqrt{b} \text{ and } \ln \frac{|\mathcal{F}|}{\delta} > 0) \\
& \leq \frac{112V_{\max}^2 \ln \frac{|\mathcal{F}| |\Pi|}{\delta}}{3n} + \sqrt{\frac{64V_{\max}^2 \ln \frac{|\mathcal{F}| |\Pi|}{\delta}}{n} \epsilon_{\mathcal{F}}}
\end{aligned}$$

170 Noticing that  $\mathbb{E}[X(\mathcal{T}_{\zeta,D}^\pi f, f, g_f^*)] = \mathcal{L}_\mu(\mathcal{T}_{\zeta,D}^\pi f; f, \pi) - \mathcal{L}_\mu(g_f^*; f, \pi)$ , we complete the proof.  $\square$

171 **Lemma 8** (Policy Evaluation Accuracy). For any  $t, k \geq 1$  and  $\pi_t$ ,  $f_{t,k}$  and  $f_{t,k-1}$  from Algorithm  
172  $I$ ,

$$\left\| f_{t,k} - \mathcal{T}_\zeta^{\pi_t} f_{t,k-1} \right\|_{2,\mu}^2 \leq \epsilon_1$$

173 where  $\epsilon_1 = \frac{208V_{\max}^2 \ln \frac{|\mathcal{F}| |\Pi|}{\delta}}{3n} + 2\epsilon_{\mathcal{F}}$ .

*Proof.*

$$\begin{aligned}
& \left\| f_{t,k} - \mathcal{T}_\zeta^{\pi_t} f_{t,k-1} \right\|_{2,\mu}^2 \\
&= \mathcal{L}_\mu(f_{t,k}; f_{t,k-1}, \pi_t) - \mathcal{L}_\mu(\mathcal{T}_\zeta^{\pi_t} f_{t,k-1}; f_{t,k-1}, \pi_t) \\
&= \left( \mathcal{L}_\mu(f_{t,k}; f_{t,k-1}, \pi_t) - \mathcal{L}_\mu(g_{f_{t,k-1}}^*; f_{t,k-1}, \pi_t) \right) - \left( \mathcal{L}_\mu(\mathcal{T}_\zeta^{\pi_t} f_{t,k-1}; f_{t,k-1}, \pi_t) - \mathcal{L}_\mu(g_{f_{t,k-1}}^*; f_{t,k-1}, \pi_t) \right) \\
&\leq \frac{112V_{\max}^2 \ln \frac{|\mathcal{F}||\Pi|}{\delta}}{3n} + \sqrt{\frac{64V_{\max}^2 \ln \frac{|\mathcal{F}||\Pi|}{\delta}}{n}} \epsilon_{\mathcal{F}} + \left\| g_{f_{t,k-1}}^* - \mathcal{T}_\zeta^{\pi_t} f_{t,k-1} \right\|_{2,\mu} \\
&\hspace{15em} \text{(Equation (35) and Lemma 7)} \\
&\leq \frac{112V_{\max}^2 \ln \frac{|\mathcal{F}||\Pi|}{\delta}}{3n} + \sqrt{\frac{64V_{\max}^2 \ln \frac{|\mathcal{F}||\Pi|}{\delta}}{n}} \epsilon_{\mathcal{F}} + \epsilon_{\mathcal{F}} \quad \text{(Definition of } g_{f_{t,k-1}}^* \text{ and Assumption 3)} \\
&\leq \frac{112V_{\max}^2 \ln \frac{|\mathcal{F}||\Pi|}{\delta}}{3n} + \frac{32V_{\max}^2 \ln \frac{|\mathcal{F}||\Pi|}{\delta}}{n} + \epsilon_{\mathcal{F}} + \epsilon_{\mathcal{F}} = \epsilon_1 \quad (\sqrt{2ab} \leq a + b)
\end{aligned}$$

174

□

175 From this lemma to the proof of main theorem, we are going to condition on the fact that the event  
176 in Assumption 2 holds. In the proof of the main theorem we will impose the union bound on all  
177 failures.

178 **Lemma 9.** For any admissible distribution  $\nu$  on  $\mathcal{S}' \times \mathcal{A}'$ , and any  $\pi_t$  from Algorithm 1.

$$\left\| \zeta(s, a) (f_{t,K}(s, a) - Q^{\pi_t}(s, a)) \right\|_{1,\nu} \leq \frac{C(\sqrt{\epsilon_1} + V_{\max}\epsilon_\mu)}{1 - \gamma} + \gamma^K V_{\max} \quad (38)$$

179 where  $\epsilon_1$  is defined in Lemma 8.

180 (Although  $f_{t,K}$  is only defined on  $\mathcal{S} \times \mathcal{A}$ ,  $\zeta$  is always zero for any other  $(s, a)$ . Thus the all values  
181 used in the proof are well-defined. Later, when it is necessary for proof, we define the value of  $f_{t,K}$   
182 outside of  $\mathcal{S} \times \mathcal{A}$  to be zero. In the algorithm, we will never need to query the value of  $f_{t,K}$  outside  
183 of  $\mathcal{S} \times \mathcal{A}$ .)

184 *Proof.* For any  $k \geq 1$  and any distribution  $\nu$  on  $\mathcal{S}' \times \mathcal{A}'$ :

$$\left\| \zeta(f_{t,k} - Q^{\pi_t}) \right\|_{1,\nu} \quad (39)$$

$$\leq \left\| \zeta(f_{t,k} - \mathcal{T}_\zeta^{\pi_t} f_{t,k-1}) \right\|_{1,\nu} + \left\| \zeta(\mathcal{T}_\zeta^{\pi_t} f_{t,k-1} - \mathcal{T}_\zeta^{\pi_t} Q^{\pi_t}) \right\|_{1,\nu} \quad (40)$$

$$\leq \left\| \zeta(f_{t,k} - \mathcal{T}_\zeta^{\pi_t} f_{t,k-1}) \right\|_{1,\nu} + \left\| \mathcal{T}_\zeta^{\pi_t} f_{t,k-1} - \mathcal{T}_\zeta^{\pi_t} Q^{\pi_t} \right\|_{1,\nu} \quad (41)$$

$$\leq C \left\| f_{t,k} - \mathcal{T}_\zeta^{\pi_t} f_{t,k-1} \right\|_{1,\hat{\mu}} + \left\| \mathcal{T}_\zeta^{\pi_t} f_{t,k-1} - \mathcal{T}_\zeta^{\pi_t} Q^{\pi_t} \right\|_{1,\nu} \quad (42)$$

$$\leq C \left( \left\| f_{t,k} - \mathcal{T}_\zeta^{\pi_t} f_{t,k-1} \right\|_{1,\mu} + V_{\max}\epsilon_\mu \right) + \left\| \mathcal{T}_\zeta^{\pi_t} f_{t,k-1} - \mathcal{T}_\zeta^{\pi_t} Q^{\pi_t} \right\|_{1,\nu} \quad (43)$$

$$\leq C \left( \left\| f_{t,k} - \mathcal{T}_\zeta^{\pi_t} f_{t,k-1} \right\|_{2,\mu} + V_{\max}\epsilon_\mu \right) + \left\| \mathcal{T}_\zeta^{\pi_t} f_{t,k-1} - \mathcal{T}_\zeta^{\pi_t} Q^{\pi_t} \right\|_{1,\nu} \quad \text{(Jensen's inequality)}$$

$$\leq C(\sqrt{\epsilon_1} + V_{\max}\epsilon_\mu) + \left\| \mathcal{T}_\zeta^{\pi_t} f_{t,k-1} - \mathcal{T}_\zeta^{\pi_t} Q^{\pi_t} \right\|_{1,\nu} \quad \text{(Lemma 8)}$$

$$= C(\sqrt{\epsilon_1} + V_{\max}\epsilon_\mu) + \mathbb{E}_\nu \left| \gamma \mathbb{E}_{P(\nu)} \sum_{a' \in \mathcal{A}} \pi_t(a' | s') \zeta(s', a') (f_{t,k-1}(s', a') - Q^{\pi_t}(s', a')) \right| \quad (44)$$

$$= C(\sqrt{\epsilon_1} + V_{\max}\epsilon_\mu) + \mathbb{E}_\nu \left[ \gamma \mathbb{E}_{P(\nu) \times \pi_t} |\zeta(s', a') (f_{t,k-1}(s', a') - Q^{\pi_t}(s', a'))| \right] \quad (45)$$

$$\leq C(\sqrt{\epsilon_1} + V_{\max}\epsilon_\mu) + \gamma \mathbb{E}_{P(\nu) \times \pi_t} |\zeta(s', a') (f_{t,k-1}(s', a') - Q^{\pi_t}(s', a'))| \quad (46)$$

$$\leq C(\sqrt{\epsilon_1} + V_{\max}\epsilon_\mu) + \gamma \left\| \zeta(f_{t,k-1} - Q^{\pi_t}) \right\|_{1,P(\nu) \times \pi} \quad (47)$$



185 Equation (42) holds since for all  $(s, a)$  s.t.  $\zeta(s, a) > 0$ ,  $\nu(s, a) \leq U \leq \frac{U}{b} \widehat{\mu}(s, a) = C \widehat{\mu}(s, a)$ .  
 186 Equation (43) holds since the total variation distance between  $\mu$  and  $\widehat{\mu}$  is bounded by  $\epsilon_\mu$  and the  
 187 Bellman error is bounded in  $[-V_{\max}, V_{\max}]$ . Equation (44) follows from  $\pi_t \in \Pi_{SC}^{all}$ . So if  $\zeta(s, a) =$   
 188  $0$ ,  $\pi(a|s) = 0$  for all  $a \in \mathcal{A}$ . Equation (45) holds since  $\zeta(\cdot, a_{\text{abs}}) = 0$ . The next equation follows  
 189 from that  $\zeta = \zeta^2$ .

190 Note that this holds for any admissible distribution  $\nu$  on  $\mathcal{S}' \times \mathcal{A}'$  and and  $k$ , as well as  $\epsilon_1$  does not  
 191 depends on  $k$ . Repeating this for  $k$  from  $K$  to 1 we will have that

$$\|\zeta(s, a)(f_{t,K}(s, a) - Q^{\pi_t}(s, a))\|_{1,\nu} \leq \frac{1 - \gamma^K}{1 - \gamma} C (\sqrt{\epsilon_1} + V_{\max} \epsilon_\mu) + \gamma^K V_{\max} \quad (48)$$

$$< \frac{C (\sqrt{\epsilon_1} + V_{\max} \epsilon_\mu)}{1 - \gamma} + \gamma^K V_{\max} \quad (49)$$

192

□

### 193 C.3 Proofs for policy improvement step

**Lemma 10** (Concentration of Policy Improvement Loss). *For any  $f \in \mathcal{F}$ , with probability at least  $1 - \delta$ ,*

$$\left\| \mathbb{E}_{\widehat{\pi}_f} [\zeta(s, a)f(s, a)] - \max_{a \in \mathcal{A}} \zeta(s, a)f(s, a) \right\|_{1,\mu} \leq \epsilon_\Pi + 2V_{\max} \sqrt{\frac{\ln(|\mathcal{F}||\Pi|/\delta)}{2n}}$$

194 where  $\widehat{\pi}_f = \arg \max_{\pi \in \Pi} \mathbb{E}_D [\mathbb{E}_\pi [\zeta(s, a)f(s, a)]]$ .

195 *Proof.* Fixed  $f$ , define  $X(s; \pi) = \max_{a \in \mathcal{A}} \zeta(s, a)f(s, a) - \mathbb{E}_\pi [\zeta(s, a)f(s, a)]$ . Notice that by  
 196 definition  $X(s; \pi)$  is always non-negative, and  $\widehat{\pi}_f = \arg \max_{\pi \in \Pi} \mathbb{E}_D [\mathbb{E}_\pi [\zeta(s, a)f(s, a)]] =$   
 197  $\arg \min_{\pi \in \Pi} \mathbb{E}_D [X(s; \pi)]$ .

Only in this proof, let  $\pi_f$  be:

$$\arg \min_{\pi \in \Pi} \mathbb{E}_\mu [X(s; \pi)] = \arg \min_{\pi \in \Pi} \left\| \mathbb{E}_\pi [\zeta(s, a)f(s, a)] - \max_{a \in \mathcal{A}} \zeta(s, a)f(s, a) \right\|_{1,\mu}.$$

198  $X(s; \pi) \in [0, V_{\max}]$ . By Hoeffding's inequality and union bound over all  $\pi \in \Pi$ ,  $f \in \mathcal{F}$ , with  
 199 probability at least  $1 - \delta$  for any  $f$  and  $\pi \neq \pi_f$ ,

$$\mathbb{E}_\mu [X(s; \pi)] - \mathbb{E}_D [X(s; \pi)] \leq V_{\max} \sqrt{\frac{\ln(|\mathcal{F}||\Pi|/\delta)}{2n}} \quad (50)$$

200 for  $\pi = \pi_f$

$$\mathbb{E}_D [X(s; \pi)] - \mathbb{E}_\mu [X(s; \pi)] \leq V_{\max} \sqrt{\frac{\ln(|\mathcal{F}||\Pi|/\delta)}{2n}} \quad (51)$$

201 If  $\widehat{\pi}_f = \pi_f$ , then  $\mathbb{E}_\mu [X(s; \widehat{\pi}_f)] \leq \epsilon_\Pi$ . Otherwise,

$$\mathbb{E}_\mu [X(s; \widehat{\pi}_f)] \quad (52)$$

$$\leq \mathbb{E}_D [X(s; \widehat{\pi}_f)] + V_{\max} \sqrt{\frac{\ln(|\mathcal{F}||\Pi|/\delta)}{2n}} \quad (53)$$

$$\leq \mathbb{E}_D [X(s; \pi_f)] + V_{\max} \sqrt{\frac{\ln(|\mathcal{F}||\Pi|/\delta)}{2n}} \quad (54)$$

$$\leq \mathbb{E}_\mu [X(s; \pi_f)] + 2V_{\max} \sqrt{\frac{\ln(|\mathcal{F}||\Pi|/\delta)}{2n}} \quad (55)$$

$$= \min_{\pi \in \Pi} \left\| \mathbb{E}_{\widehat{\pi}} [\zeta(s, a)f(s, a)] - \max_{a \in \mathcal{A}} \zeta(s, a)f(s, a) \right\|_{1,\mu} + 2V_{\max} \sqrt{\frac{\ln(|\mathcal{F}||\Pi|/\delta)}{2n}} \quad (56)$$

$$= \epsilon_\Pi + 2V_{\max} \sqrt{\frac{\ln(|\mathcal{F}||\Pi|/\delta)}{2n}} \quad (57)$$

202

□

203 For the following proof until the main theorem, we are going to condition on the fact that the high  
 204 probability bound in the lemma above holds, and impose an union bound in the proof of main  
 205 theorem.

206 **Lemma 11.** For any admissible distribution  $\nu$  on  $S'$ , any policy  $\pi : S' \rightarrow \Delta(\mathcal{A}')$ ,

$$\begin{aligned} & \mathbb{E}_\nu [\mathbb{E}_{\pi_{t+1}} [\zeta(s, a) f_{t,K}(s, a)] - \mathbb{E}_\pi [\zeta(s, a) f_{t,K}(s, a)]] \geq \\ & -C \left( \epsilon_\Pi + V_{\max} \epsilon_\mu + 2V_{\max} \sqrt{\frac{\ln(|\mathcal{F}||\Pi|/\delta)}{2n}} \right) \end{aligned}$$

207 *Proof.* Recall that  $\pi_{t+1} = \Xi(\hat{\pi}_{t+1})$ . So  $\pi_{t+1}(a|s) = \hat{\pi}_{t+1}(a|s)$  for all  $a$  such that  $\zeta(s, a) = 1$ . Then

$$\begin{aligned} & \mathbb{E}_{\pi_{t+1}} [\zeta(s, a) f_{t,K}(s, a)] = \mathbb{E}_{\hat{\pi}_{t+1}} [\zeta(s, a) f_{t,K}(s, a)] \\ & \mathbb{E}_\nu [\mathbb{E}_{\pi_{t+1}} [\zeta(s, a) f_{t,K}(s, a)]] = \mathbb{E}_\nu [\mathbb{E}_{\hat{\pi}_{t+1}} [\zeta(s, a) f_{t,K}(s, a)]] \end{aligned}$$

$$\mathbb{E}_\nu [\mathbb{E}_{\pi_{t+1}} [\zeta(s, a) f_{t,K}(s, a)] - \mathbb{E}_\pi [\zeta(s, a) f_{t,K}(s, a)]] \quad (58)$$

$$= \mathbb{E}_\nu [\mathbb{E}_{\hat{\pi}_{t+1}} [\zeta(s, a) f_{t,K}(s, a)] - \mathbb{E}_\pi [\zeta(s, a) f_{t,K}(s, a)]] \quad (59)$$

$$= \mathbb{E}_\nu \left[ \mathbb{E}_{\hat{\pi}_{t+1}} [\zeta(s, a) f_{t,K}(s, a)] - \max_{a \in \mathcal{A}} \zeta(s, a) f_{t,K}(s, a) + \max_{a \in \mathcal{A}} \zeta(s, a) f_{t,K}(s, a) - \mathbb{E}_\pi [\zeta(s, a) f_{t,K}(s, a)] \right] \quad (60)$$

$$\geq \mathbb{E}_\nu \left[ \mathbb{E}_{\hat{\pi}_{t+1}} [\zeta(s, a) f_{t,K}(s, a)] - \max_{a \in \mathcal{A}} \zeta(s, a) f_{t,K}(s, a) \right] \quad (61)$$

$$\geq -\mathbb{E}_\nu \left| \mathbb{E}_{\hat{\pi}_{t+1}} [\zeta(s, a) f_{t,K}(s, a)] - \max_{a \in \mathcal{A}} \zeta(s, a) f_{t,K}(s, a) \right| \quad (62)$$

$$= -\left\| \mathbb{E}_{\hat{\pi}_{t+1}} [\zeta(s, a) f_{t,K}(s, a)] - \max_{a \in \mathcal{A}} \zeta(s, a) f_{t,K}(s, a) \right\|_{1, \nu} \quad (63)$$

$$\geq -C \left\| \mathbb{E}_{\hat{\pi}_{t+1}} [\zeta(s, a) f_{t,K}(s, a)] - \max_{a \in \mathcal{A}} \zeta(s, a) f_{t,K}(s, a) \right\|_{1, \hat{\mu}} \quad (64)$$

208 The last step follows from that  $\zeta(s, a) = 1 \Rightarrow \hat{\mu}(s, a) \geq b \Rightarrow \hat{\mu}(s) \geq b \Rightarrow -\nu(s) \geq -U \geq$   
 209  $-C\hat{\mu}(s)$ , and for all other  $(s, a)$  the term inside of norm is zero. Since the total variation distance  
 210 between  $\hat{\mu}$  and  $\mu$  is bounded by  $\epsilon_\mu$

$$\left\| \mathbb{E}_{\hat{\pi}_{t+1}} [\zeta(s, a) f_{t,K}(s, a)] - \max_{a \in \mathcal{A}} \zeta(s, a) f_{t,K}(s, a) \right\|_{1, \hat{\mu}} \quad (65)$$

$$\leq \left\| \mathbb{E}_{\hat{\pi}_{t+1}} [\zeta(s, a) f_{t,K}(s, a)] - \max_{a \in \mathcal{A}} \zeta(s, a) f_{t,K}(s, a) \right\|_{1, \mu} + V_{\max} \epsilon_\mu \quad (66)$$

211 By Lemma 10:

$$\left\| \mathbb{E}_{\hat{\pi}_{t+1}} [\zeta(s, a) f_{t,K}(s, a)] - \max_{a \in \mathcal{A}} \zeta(s, a) f_{t,K}(s, a) \right\|_{1, \mu} \leq \epsilon_\Pi + 2V_{\max} \sqrt{\frac{\ln(|\mathcal{F}||\Pi|/\delta)}{2n}} \quad (67)$$

212 Then we finished the proof by plug this into the last equation.  $\square$

213 **Lemma 12.** For any  $(s, a) \in S' \times \mathcal{A}'$ , and any  $\pi_t, \pi_{t+1}$  in Algorithm 1,

$$Q^{\pi_{t+1}}(s, a) - Q^{\pi_t}(s, a) \geq -\frac{2C\sqrt{\epsilon_1} + 3V_{\max}C\epsilon_\mu}{(1-\gamma)^2} - \frac{\epsilon_2 + 2\gamma^K V_{\max}}{1-\gamma} \quad (68)$$

214 where  $\epsilon_1$  is defined in Lemma 8,  $\epsilon_2 = C \left( \epsilon_\Pi + 2V_{\max} \sqrt{\frac{\ln(|\mathcal{F}||\Pi|/\delta)}{2n}} \right)$ .

215 *Proof.* For any  $s'$ , only in this proof, let  $\eta_h^{\pi_{t+1}}$  be the state distribution on the  $h$ th step from initial  
 216 state  $s'$  following  $\pi_{t+1}$ . By applying performance difference lemma [3],

$$V^{\pi_{t+1}}(s') - V^{\pi_t}(s') \tag{69}$$

$$= \sum_{h=1}^{\infty} \gamma^{h-1} \mathbb{E}_{z \sim \eta_h^{\pi_{t+1}}} \left[ \sum_{a \in \mathcal{A}'} (\pi_{t+1}(a|z) Q^{\pi_t}(z, a) - \pi_t(a|z) Q^{\pi_t}(z, a)) \right] \tag{70}$$

$$= \sum_{h=1}^{\infty} \gamma^{h-1} \mathbb{E}_{z \sim \eta_h^{\pi_{t+1}}} \left[ \sum_{a \in \mathcal{A}'} (1 - \zeta(z, a)) (\pi_{t+1}(a|z) Q^{\pi_t}(z, a) - \pi_t(a|z) Q^{\pi_t}(z, a)) \right] \tag{71}$$

$$+ \sum_{a \in \mathcal{A}'} \zeta(z, a) (\pi_{t+1}(a|z) Q^{\pi_t}(z, a) - \pi_t(a|z) Q^{\pi_t}(z, a)) \tag{72}$$

217 Because  $\pi_t, \pi_{t+1} \in \Pi_{SC}^{all}$ ,  $\zeta(z, a) = 0$  means either  $\pi_t(a|z) = \pi_{t+1}(a|z) = 0$  or  $a = a_{\text{abs}}$ . So the  
 218 first term is zero. Then:

$$V^{\pi_{t+1}}(s') - V^{\pi_t}(s') \tag{73}$$

$$= \sum_{h=1}^{\infty} \gamma^{h-1} \mathbb{E}_{z \sim \eta_h^{\pi_{t+1}}} \left[ \sum_{a \in \mathcal{A}'} \zeta(z, a) (\pi_{t+1}(a|z) Q^{\pi_t}(z, a) - \pi_t(a|z) Q^{\pi_t}(z, a)) \right] \tag{74}$$

$$= \sum_{h=1}^{\infty} \gamma^{h-1} \mathbb{E}_{z \sim \eta_h^{\pi_{t+1}}} \left[ \sum_{a \in \mathcal{A}} \zeta(z, a) (\pi_{t+1}(a|z) Q^{\pi_t}(z, a) - \pi_t(a|z) Q^{\pi_t}(z, a)) \right] \tag{75}$$

$$= \sum_{h=1}^{\infty} \gamma^{h-1} \mathbb{E}_{z \sim \eta_h^{\pi_{t+1}}} \left[ \sum_{a \in \mathcal{A}} \zeta(z, a) (\pi_{t+1}(a|z) Q^{\pi_t}(z, a) - \pi_{t+1}(a|z) f_{t,K}(z, a)) \right] \tag{76}$$

$$+ \sum_{a \in \mathcal{A}} \zeta(z, a) (\pi_{t+1}(a|z) f_{t,K}(z, a) - \pi_t(a|z) f_{t,K}(z, a)) \tag{77}$$

$$+ \sum_{a \in \mathcal{A}} \zeta(z, a) (\pi_t(a|z) f_{t,K}(z, a) - \pi_t(a|z) Q^{\pi_t}(z, a)) \tag{78}$$

219 Equation 75 follows from  $Q^\pi(s, a_{\text{abs}}) = 0$  for any  $\pi$  and  $s$ . By Lemma 11, for any  $h$ ,

$$\mathbb{E}_{z \sim \eta_h^{\pi_{t+1}}} \left[ \sum_{a \in \mathcal{A}} \zeta(z, a) (\pi_{t+1}(a|z) f_{t,K}(z, a) - \pi_t(a|z) f_{t,K}(z, a)) \right] \tag{79}$$

$$= \mathbb{E}_{z \sim \eta_h^{\pi_{t+1}}} [\mathbb{E}_{\pi_{t+1}} [\zeta(s, a) f_{t,K}(s, a)] - \mathbb{E}_{\pi_t} [\zeta(s, a) f_{t,K}(s, a)]] \geq -\epsilon_2 - CV_{\max} \epsilon_\mu \tag{80}$$

220 Then

$$V^{\pi_{t+1}}(s') - V^{\pi_t}(s') \quad (81)$$

$$\geq \sum_{h=1}^{\infty} \gamma^{h-1} \mathbb{E}_{z \sim \eta_h^{\pi_{t+1}}} \left[ \sum_{a \in \mathcal{A}} \zeta(z, a) (\pi_{t+1}(a|z) Q^{\pi_t}(z, a) - \pi_{t+1}(a|z) f_{t,K}(z, a)) \right] \quad (82)$$

$$+ \sum_{a \in \mathcal{A}} \zeta(z, a) (\pi_t(a|z) f_{t,K}(z, a) - \pi_t(a|z) Q^{\pi_t}(z, a)) \Big] - \frac{\epsilon_2 + CV_{\max} \epsilon_\mu}{1 - \gamma} \quad (83)$$

$$\geq - \sum_{h=1}^{\infty} \gamma^{h-1} \left( \|\zeta(z, a)(Q^{\pi_t}(z, a) - f_{t,K}(z, a))\|_{1, \eta_h^{\pi_{t+1}}} \right. \quad (84)$$

$$\left. + \|\zeta(z, a)(Q^{\pi_t}(z, a) - f_{t,K}(z, a))\|_{1, \eta_h^{\pi_{t+1}} \times \pi_t} \right) - \frac{\epsilon_2 + CV_{\max} \epsilon_\mu}{1 - \gamma} \quad (85)$$

$$\geq - \sum_{h=1}^{\infty} \gamma^{h-1} \left( \|\zeta(z, a)(Q^{\pi_t}(z, a) - f_{t,K}(z, a))\|_{2, \eta_h^{\pi_{t+1}}} \right. \quad (86)$$

$$\left. + \|\zeta(z, a)(Q^{\pi_t}(z, a) - f_{t,K}(z, a))\|_{2, \eta_h^{\pi_{t+1}} \times \pi_t} \right) - \frac{\epsilon_2 + CV_{\max} \epsilon_\mu}{1 - \gamma} \quad (87)$$

$$\geq \frac{-2C(\sqrt{\epsilon_1} + V_{\max} \epsilon_\mu)}{(1 - \gamma)^2} - \frac{2\gamma^K V_{\max}}{1 - \gamma} - \frac{\epsilon_2 + CV_{\max} \epsilon_\mu}{1 - \gamma} \quad (\text{Lemma 9})$$

221 Equation 87 follows from Jensen's inequality. Since this holds for any  $s'$ , we proved that for any  
222  $(s, a)$ ,

$$[Q^{\pi_{t+1}}(s, a) - Q^{\pi_t}(s, a)] \quad (88)$$

$$= \gamma \mathbb{E}_{s'} [V^{\pi_{t+1}}(s') - V^{\pi_t}(s')] \quad (89)$$

$$\geq \frac{-2C(\sqrt{\epsilon_1} + V_{\max} \epsilon_\mu)}{(1 - \gamma)^2} - \frac{2\gamma^K V_{\max}}{1 - \gamma} - \frac{\epsilon_2 + CV_{\max} \epsilon_\mu}{1 - \gamma} \quad (90)$$

$$\geq - \frac{2C\sqrt{\epsilon_1} + 3CV_{\max} \epsilon_\mu}{(1 - \gamma)^2} - \frac{2\gamma^K V_{\max}}{1 - \gamma} - \frac{\epsilon_2}{1 - \gamma} \quad (91)$$

223

□

#### 224 C.4 Proof of main theorems

225 **Theorem 2.** Given an MDP  $M = \langle \mathcal{S}, \mathcal{A}, R, P, \gamma, p \rangle$ , a dataset  $D = \{(s, a, r, s')\}$  with  $n$  samples  
226 that is draw i.i.d. from  $\mu \times R \times P$ , and a finite  $Q$ -function classes  $\mathcal{F}$  and a finite policy class  $\Pi$   
227 satisfying Assumption 3 and 4,  $\pi_t = \Xi(\hat{\pi}_t)$  from Algorithm 1 satisfies that with probability at least  
228  $1 - 3\delta$ ,

$$v^{\tilde{\pi}} - v^{\pi_t} \leq \frac{4C}{(1 - \gamma)^3} \left( \sqrt{\frac{419V_{\max}^2 \ln \frac{|\mathcal{F}||\Pi|}{\delta}}{3n}} + 2\sqrt{\epsilon_{\mathcal{F}}} \right) + \frac{6CV_{\max} \epsilon_\mu}{(1 - \gamma)^3} + \frac{2C\epsilon_\Pi + 3\gamma^{K-1}V_{\max}}{(1 - \gamma)^2}$$

229 for any policy  $\tilde{\pi} \in \Pi_{SC}^{all}$ .

230 *Proof.* For simplicity of the notation, let  $\epsilon_1 = \frac{208V_{\max}^2 \ln \frac{|\mathcal{F}||\Pi|}{\delta}}{3n} + 2\epsilon_{\mathcal{F}}$ ,  $\epsilon_2 =$   
231  $C \left( \epsilon_\Pi + 2V_{\max} \sqrt{\frac{\ln(|\mathcal{F}||\Pi|/\delta)}{2n}} \right)$  and  $\epsilon_3 = \frac{2C\sqrt{\epsilon_1} + 3V_{\max} C \epsilon_\mu}{(1 - \gamma)^2} + \frac{\epsilon_2 + 2\gamma^K V_{\max}}{1 - \gamma}$ . We start by proving

232 a stronger result. For any  $\tilde{\pi} \in \Pi_{SC}^{all}$ , we will upper bound  $\mathbb{E}_\nu [V^{\tilde{\pi}} - V^{\pi_t}]$  for any admissible

233 distribution  $\nu$  over  $S'$  which will naturally be an upper bound for  $v^{\tilde{\pi}} - v^{\pi_t}$

$$\begin{aligned}
& \mathbb{E}_\nu[V^{\tilde{\pi}} - V^{\pi_{t+1}}] \\
&= \mathbb{E}_\nu \left[ V^{\tilde{\pi}}(s) - \sum_{a \in \mathcal{A}'} \pi_{t+1}(a|s) Q^{\pi_t}(s, a) + \sum_{a \in \mathcal{A}'} \pi_{t+1}(a|s) Q^{\pi_t}(s, a) - V^{\pi_{t+1}}(s) \right] \\
&= \mathbb{E}_\nu \left[ V^{\tilde{\pi}}(s) - \sum_{a \in \mathcal{A}'} \pi_{t+1}(a|s) Q^{\pi_t}(s, a) + \sum_{a \in \mathcal{A}'} \pi_{t+1}(a|s) (Q^{\pi_t}(s, a) - Q^{\pi_{t+1}}(s, a)) \right] \\
&\leq \mathbb{E}_\nu \sum_{a \in \mathcal{A}'} \left[ \tilde{\pi}(a|s) Q^{\tilde{\pi}}(s, a) - \pi_{t+1}(a|s) Q^{\pi_t}(s, a) \right] + \epsilon_3 \quad (\text{Lemma 12}) \\
&= \mathbb{E}_\nu \sum_{a \in \mathcal{A}'} \zeta(s, a) [\tilde{\pi}(a|s) Q^{\tilde{\pi}}(s, a) - \pi_{t+1}(a|s) Q^{\pi_t}(s, a)] + \epsilon_3 \\
&= \mathbb{E}_\nu \left[ \mathbb{E}_{\tilde{\pi}} \left[ \zeta(s, a) Q^{\tilde{\pi}}(s, a) \right] - \mathbb{E}_{\pi_{t+1}} \left[ \zeta(s, a) f_t(s, a) \right] \right. \\
&\quad \left. + \mathbb{E}_{\pi_{t+1}} \left[ \zeta(s, a) f_t(s, a) \right] - \mathbb{E}_{\pi_{t+1}} \left[ \zeta(s, a) Q^{\pi_{t+1}}(s, a) \right] \right] + \epsilon_3 \\
&\leq \mathbb{E}_\nu \left[ \mathbb{E}_{\tilde{\pi}} \left[ \zeta(s, a) Q^{\tilde{\pi}}(s, a) \right] - \mathbb{E}_{\pi_{t+1}} \left[ \zeta(s, a) f_t(s, a) \right] \right] \\
&\quad + \|\zeta(z, a)(Q^{\pi_t}(z, a) - f_t(z, a))\|_{1, \nu \times \pi_{t+1}} + \epsilon_3 \\
&\leq \mathbb{E}_\nu \left[ \mathbb{E}_{\tilde{\pi}} \left[ \zeta(s, a) Q^{\tilde{\pi}}(s, a) \right] - \mathbb{E}_{\pi_{t+1}} \left[ \zeta(s, a) f_t(s, a) \right] \right] + \frac{C\sqrt{\epsilon_1} + CV_{\max}\epsilon_\mu}{1-\gamma} + \gamma^K V_{\max} + \epsilon_3 \\
&\quad (\text{Lemma 9}) \\
&\leq \mathbb{E}_\nu \left[ \mathbb{E}_{\tilde{\pi}} \left[ \zeta(s, a) Q^{\tilde{\pi}}(s, a) \right] - \mathbb{E}_{\tilde{\pi}} \left[ \zeta(s, a) f_t(s, a) \right] \right] + \epsilon_2 + CV_{\max}\epsilon_\mu + \frac{C\sqrt{\epsilon_1} + CV_{\max}\epsilon_\mu}{1-\gamma} + \gamma^K V_{\max} + \epsilon_3 \\
&\quad (\text{Lemma 11}) \\
&\leq \mathbb{E}_\nu \left[ \mathbb{E}_{\tilde{\pi}} \left[ \zeta(s, a) Q^{\tilde{\pi}}(s, a) \right] - \mathbb{E}_{\tilde{\pi}} \left[ \zeta(s, a) Q^{\pi_t}(s, a) \right] \right] + \epsilon_2 + \frac{2C\sqrt{\epsilon_1} + 3CV_{\max}\epsilon_\mu}{1-\gamma} + 2\gamma^K V_{\max} + \epsilon_3 \\
&\quad (\text{Lemma 9}) \\
&= \mathbb{E}_{\nu \times \tilde{\pi}} \left[ \zeta(s, a) Q^{\tilde{\pi}}(s, a) - \zeta(s, a) Q^{\pi_t}(s, a) \right] + \epsilon_2 + \frac{2C\sqrt{\epsilon_1} + 3CV_{\max}\epsilon_\mu}{1-\gamma} + 2\gamma^K V_{\max} + \epsilon_3 \\
&= \mathbb{E}_{\nu \times \tilde{\pi}} \left[ Q^{\tilde{\pi}}(s, a) - Q^{\pi_t}(s, a) \right] + \epsilon_2 + \frac{2C\sqrt{\epsilon_1} + 3CV_{\max}\epsilon_\mu}{1-\gamma} + 2\gamma^K V_{\max} + \epsilon_3 \quad (\pi_t \in \Pi_{SC}^{all}) \\
&\leq \gamma \mathbb{E}_{P(\nu \times \tilde{\pi})} [V^{\tilde{\pi}} - V^{\pi_t}] + \epsilon_2 + \frac{2C\sqrt{\epsilon_1} + 3CV_{\max}\epsilon_\mu}{1-\gamma} + 2\gamma^K V_{\max} + \epsilon_3
\end{aligned}$$

234 The second to last step follows from  $\pi_t \in \Pi_{SC}^{all}$ : for all  $s, a$  such that  $\tilde{\pi}(a|s) > 0$ , either  $\zeta(s, a) = 1$ ,  
235 or  $a = a_{\text{abs}}$ . The later two indicate that  $Q^{\pi_t}(s, a) = Q^{\tilde{\pi}}(s, a) = 0$ . So for all  $s, a$  such that  
236  $\tilde{\pi}(a|s) > 0$ ,  $Q^{\tilde{\pi}}(s, a) = \zeta(s, a) Q^{\tilde{\pi}}(s, a)$  and  $Q^{\pi_t}(s, a) = \zeta(s, a) Q^{\pi_t}(s, a)$ . Now we proved

$$\mathbb{E}_\nu[V^{\tilde{\pi}} - V^{\pi_{t+1}}] \leq \gamma \mathbb{E}_{P(\nu \times \tilde{\pi})} [V^{\tilde{\pi}} - V^{\pi_t}] + \epsilon_2 + \epsilon_3 + \frac{2C\sqrt{\epsilon_1} + 3CV_{\max}\epsilon_\mu}{1-\gamma} + 2\gamma^K V_{\max} \quad (92)$$

237 holds for any distribution  $\nu$ . The error terms do not depend on  $t$  and this holds for any  $t$ . We can  
 238 repeatedly apply this for all  $0 < t' \leq t$ . Assuming  $t \geq K$  this will give us :

$$\begin{aligned}
 & \mathbb{E}_\nu[V^{\tilde{\pi}} - V^{\pi_{t+1}}] \\
 & \leq \frac{1-\gamma^t}{1-\gamma} \left( \epsilon_2 + \epsilon_3 + \frac{2C\sqrt{\epsilon_1} + 3CV_{\max}\epsilon_\mu}{1-\gamma} + 2\gamma^K V_{\max} \right) + \gamma^t V_{\max} \\
 & \leq \frac{\epsilon_2}{1-\gamma} + \frac{\epsilon_3}{1-\gamma} + \frac{2C\sqrt{\epsilon_1}}{(1-\gamma)^2} + \frac{3CV_{\max}\epsilon_\mu}{(1-\gamma)^2} + \frac{3\gamma^K V_{\max}}{1-\gamma} \\
 & \leq \frac{2\epsilon_2}{(1-\gamma)^2} + \frac{4C\sqrt{\epsilon_1}}{(1-\gamma)^3} + \frac{6CV_{\max}\epsilon_\mu}{(1-\gamma)^3} + \frac{3\gamma^{K-1}V_{\max}}{(1-\gamma)^2} \\
 & \leq \frac{2C\epsilon_\Pi}{(1-\gamma)^2} + \frac{4C}{(1-\gamma)^2} \sqrt{\frac{V_{\max}^2 \ln(|\mathcal{F}||\Pi|/\delta)}{2n}} + \frac{4C\sqrt{\epsilon_1}}{(1-\gamma)^3} + \frac{6CV_{\max}\epsilon_\mu}{(1-\gamma)^3} + \frac{3\gamma^{K-1}V_{\max}}{(1-\gamma)^2} \\
 & \leq \frac{2C\epsilon_\Pi}{(1-\gamma)^2} + \frac{4C}{(1-\gamma)^3} \left( \sqrt{\frac{V_{\max}^2 \ln(|\mathcal{F}||\Pi|/\delta)}{2n}} + \sqrt{\frac{208V_{\max}^2 \ln(|\mathcal{F}||\Pi|/\delta)}{3n}} + 2\epsilon_{\mathcal{F}} \right) \\
 & \quad + \frac{6CV_{\max}\epsilon_\mu}{(1-\gamma)^3} + \frac{3\gamma^{K-1}V_{\max}}{(1-\gamma)^2} \\
 & \leq \frac{2C\epsilon_\Pi}{(1-\gamma)^2} + \frac{4C}{(1-\gamma)^3} \left( \sqrt{\frac{V_{\max}^2 \ln(|\mathcal{F}||\Pi|/\delta)}{2n}} + \sqrt{\frac{208V_{\max}^2 \ln(|\mathcal{F}||\Pi|/\delta)}{3n}} + \sqrt{2\epsilon_{\mathcal{F}}} \right) \\
 & \quad + \frac{6CV_{\max}\epsilon_\mu}{(1-\gamma)^3} + \frac{3\gamma^{K-1}V_{\max}}{(1-\gamma)^2} \\
 & \leq \frac{2C\epsilon_\Pi}{(1-\gamma)^2} + \frac{4C}{(1-\gamma)^3} \left( \sqrt{\frac{419V_{\max}^2 \ln(|\mathcal{F}||\Pi|/\delta)}{3n}} + \sqrt{2\epsilon_{\mathcal{F}}} \right) + \frac{6CV_{\max}\epsilon_\mu}{(1-\gamma)^3} + \frac{3\gamma^{K-1}V_{\max}}{(1-\gamma)^2}
 \end{aligned}$$

239 The last step follows from that  $a + b \leq \sqrt{2(a^2 + b^2)}$ . The error bound is finished by simplifying the  
 240 expression. The failure probability  $3\delta$  is from the union bound of probability  $\delta$  on which Assumption  
 241 2 fails, probability  $\delta$  on which Lemma 7 fails, and the probability  $\delta$  on which Lemma 10 fails.  $\square$

242 Now we are going to use the fact that there is an almost no-value-loss projection from the  $\zeta$ -  
 243 constrained policy set to the strong  $\zeta$ -constrained policy set in order to prove an error bound w.r.t  
 244 any  $\tilde{\pi} \in \Pi_C^{all}$ .

245 **Theorem 1.** Given an MDP  $M = \langle \mathcal{S}, \mathcal{A}, R, P, \gamma, p \rangle$ , a dataset  $D = \{(s, a, r, s')\}$  with  $n$  samples  
 246 that is draw i.i.d. from  $\mu \times R \times P$ , and a finite  $Q$ -function classes  $\mathcal{F}$  and a finite policy class  $\Pi$   
 247 satisfying Assumption 3 and 4,  $\hat{\pi}_t$  from Algorithm 1 satisfies that with probability at least  $1 - 3\delta$ ,

$$v_M^{\tilde{\pi}} - v_M^{\hat{\pi}_t} \leq \frac{4C}{(1-\gamma)^3} \left( \sqrt{\frac{419V_{\max}^2 \ln \frac{|\mathcal{F}||\Pi|}{\delta}}{3n}} + 2\sqrt{\epsilon_{\mathcal{F}}} \right) + \frac{6CV_{\max}\epsilon_\mu}{(1-\gamma)^3} + \frac{2C\epsilon_\Pi + 3\gamma^{K-1}V_{\max}}{(1-\gamma)^2} + \frac{V_{\max}\epsilon_\zeta}{1-\gamma}$$

248 for any policy  $\tilde{\pi} \in \Pi_C^{all}$  and only take action over  $\mathcal{A}$ .

249 *Proof.* For any policy  $\tilde{\pi}$  that only take action over  $\mathcal{A}$ , Lemma 3 tells that  $v_M^{\tilde{\pi}} \leq v_{M'}^{\Xi(\tilde{\pi})} + \frac{V_{\max}\epsilon_\zeta}{1-\gamma}$ .  
 250 Since  $\pi_t = \Xi(\hat{\pi}_t)$  and  $\hat{\pi}_t$  only takes action in  $\mathcal{A}$ , by Lemma 1 and Lemma 2  $v_M^{\hat{\pi}_t} = v_{M'}^{\hat{\pi}_t} \geq v_M^{\pi_t}$ .  
 251 Then  $v_M^{\tilde{\pi}} - v_M^{\hat{\pi}_t} \leq v_{M'}^{\Xi(\tilde{\pi})} - v_{M'}^{\hat{\pi}_t} + \frac{V_{\max}\epsilon_\zeta}{1-\gamma}$  and Theorem 2 completes the proof.  $\square$

252 When there exist an optimal policy that is supported well by  $\mu$ . We can derive the following result  
 253 about value gap between learned policy and optimal policy immediately from the main theorem  
 254 about approximate policy iteration.

255 **Corollary 2.** *If there exists an  $\pi^*$  on  $M$  such that  $\Pr(\mu(s, a) \leq 2b|\pi^*) \leq \epsilon$ . then under the*  
 256 *assumptions of Theorem 1,  $\hat{\pi}_t$  from Algorithm 1 satisfies that with probability at least  $1 - 3\delta$ ,*

$$v_M^{\pi^*} - v_M^{\hat{\pi}_t} \leq \frac{4C}{(1-\gamma)^3} \left( \sqrt{\frac{419V_{\max}^2 \ln \frac{|\mathcal{F}||\Pi|}{\delta}}{3n}} + 2\sqrt{\epsilon_{\mathcal{F}}} \right) + \frac{6CV_{\max}\epsilon_{\mu}}{(1-\gamma)^3} \\ + \frac{2C\epsilon_{\Pi} + 3\gamma^{K-1}V_{\max}}{(1-\gamma)^2} + \frac{V_{\max}(\epsilon + C\epsilon_{\mu})}{1-\gamma}$$

257 *Proof.* Given the condition of  $\pi^*$ ,

$$\Pr(\hat{\mu}(s, a) \leq b|\pi^*) \leq \Pr(\mu(s, a) \leq 2b|\pi^*) + \Pr(|\mu(s, a) - \hat{\mu}(s, a)| \geq b|\pi^*) \quad (93)$$

$$\leq \epsilon + \Pr(|\mu(s, a) - \hat{\mu}(s, a)| \geq b|\pi^*) \quad (94)$$

$$\leq \epsilon + \frac{\mathbb{E}_{\eta^{\pi^*}} [|\mu(s, a) - \hat{\mu}(s, a)|]}{b} \quad (95)$$

$$\leq \epsilon + \frac{Ud_{\text{TV}}(\mu(s, a), \hat{\mu}(s, a))}{b} \quad (96)$$

$$\leq \epsilon + C\epsilon_{\mu} \quad (97)$$

258 Then  $\pi^* \in \Pi_C^{\text{all}}$  with  $\epsilon_{\zeta} = \epsilon + C\epsilon_{\mu}$ , and applying Theorem 1 finished the proof.  $\square$

### 259 C.5 Safe Policy Improvement Result

260 In many scenarios we aim to have a policy improvement that is guaranteed to be no worse than  
 261 the data collection policy, which is called safe policy improvement. By abusing the notation a bit,  
 262 let  $\mu(a|s)$  be a policy that generate the data set. For our algorithm, the safe policy improvement  
 263 will hold if  $\mu \in \Pi_C^{\text{all}}$ . To show  $\mu \in \Pi_C^{\text{all}}$ , we only need that  $\Pr(\mu(s, a) \leq b|\mu) \leq \epsilon_{\zeta}$ . When  
 264 the state-action space is finite, there must exist an minimum value for all non-zero  $\mu(s, a)$ 's. Let  
 265  $\mu_{\min} = \min_{s, a, s.t. \mu(s, a) > 0} \mu(s, a)$ . Then we have that, if  $b \leq \mu_{\min}$ .  $\Pr(\mu(s, a) \leq b|\mu) = 0$ . Thus  
 266 we have:

267 **Corollary 3.** *With finite state action space and  $b \leq \mu_{\min}$ , under the assumptions as Theorem 1,  $\hat{\pi}_t$*   
 268 *from Algorithm 1 satisfies that with probability at least  $1 - 3\delta$ ,*

$$v_M^{\mu} - v_M^{\hat{\pi}_t} \leq \frac{52V_{\max} \sqrt{|\mathcal{S}||\mathcal{A}|} (\sqrt{\ln(2|\mathcal{S}||\mathcal{A}|/\delta)} + \sqrt{\ln(1+nV_{\max})}) + 8}{\sqrt{nb}(1-\gamma)^3} \\ + \frac{12V_{\max}|\mathcal{S}||\mathcal{A}| \ln(2|\mathcal{S}||\mathcal{A}|/\delta)}{nb(1-\gamma)^3} + \frac{3\gamma^{K-1}V_{\max}}{(1-\gamma)^2}$$

269 *Proof.* In finite state action space, the number of all deterministic policies is less than  $|\mathcal{A}|^{|\mathcal{S}|}$ . Thus  
 270 we have a policy class with  $\epsilon_{\Pi} = 0$  and  $|\Pi| \leq |\mathcal{A}|^{|\mathcal{S}|}$ . Since the  $Q$  value is bounded in  $[0, V_{\max}]$ ,  
 271 we can construct a  $\epsilon$  covering set  $\mathcal{F}$  of all value functions in  $[0, V_{\max}]^{|\mathcal{S}||\mathcal{A}|}$  with  $(\frac{V_{\max}}{\epsilon} + 1)^{|\mathcal{S}||\mathcal{A}|}$   
 272 functions. Then  $\epsilon_{\mathcal{F}} \leq \max_g \min_{f \in \mathcal{F}} \|f - g\|_{\mu, 2} \leq \max_g \min_{f \in \mathcal{F}} \|f - g\|_{\infty} \leq \epsilon$ .

273 We can also bound  $\epsilon_{\mu}$  in finite state action space. For any fixed  $s, a$ , by Bernstein's inequality we  
 274 have that with probability of  $1 - \frac{\delta}{|\mathcal{S}||\mathcal{A}|}$ :

$$|\hat{\mu}(s, a) - \mu(s, a)| = \left| \frac{1}{n} \sum_{i=1}^n \mathbb{1}(s^{(i)} = s, a^{(i)} = a) - \mathbb{E}[\mathbb{1}(s^{(i)} = s, a^{(i)} = a)] \right| \quad (98)$$

$$\leq \sqrt{\frac{2\mathbb{V}[\mathbb{1}(s^{(i)} = s, a^{(i)} = a)] \ln(2|\mathcal{S}||\mathcal{A}|/\delta)}{n}} + \frac{4 \ln(2|\mathcal{S}||\mathcal{A}|/\delta)}{n} \quad (99)$$

$$= \sqrt{\frac{2\mu(s, a)(1 - \mu(s, a)) \ln(2|\mathcal{S}||\mathcal{A}|/\delta)}{n}} + \frac{4 \ln(2|\mathcal{S}||\mathcal{A}|/\delta)}{n} \quad (100)$$

275 By taking summation of  $|\hat{\mu}(s, a) - \mu(s, a)|$  and union bound over all  $(s, a)$ , we can bound the total  
 276 variation bounds between  $\hat{\mu}$  and  $\mu$ , with probability at least  $1 - \delta$ ,

$$\|\hat{\mu} - \mu\|_{TV} = \frac{1}{2} \sum_{s,a} |\hat{\mu}(s, a) - \mu(s, a)| \quad (101)$$

$$\leq \frac{1}{2} \sum_{s,a} \left( \sqrt{\frac{2\mu(s, a)(1 - \mu(s, a)) \ln(2|\mathcal{S}||\mathcal{A}|/\delta)}{n}} + \frac{4 \ln(2|\mathcal{S}||\mathcal{A}|/\delta)}{n} \right) \quad (102)$$

$$= \frac{2|\mathcal{S}||\mathcal{A}| \ln(2|\mathcal{S}||\mathcal{A}|/\delta)}{n} + \frac{1}{2} \sum_{s,a} \sqrt{\frac{2\mu(s, a)(1 - \mu(s, a)) \ln(2|\mathcal{S}||\mathcal{A}|/\delta)}{n}} \quad (103)$$

$$\leq \frac{2|\mathcal{S}||\mathcal{A}| \ln(2|\mathcal{S}||\mathcal{A}|/\delta)}{n} + \frac{1}{2} \sqrt{\sum_{s,a} \frac{2\mu(s, a) \ln(2|\mathcal{S}||\mathcal{A}|/\delta)}{n} \sum_{s,a} (1 - \mu(s, a))} \quad (104)$$

(Cauchy-Schwartz's inequality)

$$= \frac{2|\mathcal{S}||\mathcal{A}| \ln(2|\mathcal{S}||\mathcal{A}|/\delta)}{n} + \frac{1}{2} \sqrt{\frac{2 \ln(2|\mathcal{S}||\mathcal{A}|/\delta)}{n} (|\mathcal{S}||\mathcal{A}| - 1)} \quad (104)$$

$$\leq \frac{2|\mathcal{S}||\mathcal{A}| \ln(2|\mathcal{S}||\mathcal{A}|/\delta)}{n} + \sqrt{\frac{|\mathcal{S}||\mathcal{A}| \ln(2|\mathcal{S}||\mathcal{A}|/\delta)}{2n}} \quad (105)$$

277 Now in a finite state action space we can construct the policy and  $Q$  function sets with  $|\mathcal{F}| \leq$   
 278  $(\frac{V_{\max}}{\epsilon} + 1)^{|\mathcal{S}||\mathcal{A}|}$ ,  $|\Pi| \leq |\mathcal{A}|^{|\mathcal{S}|}$ ,  $\epsilon_{\Pi} = 0$ ,  $\epsilon_{\mathcal{F}} \leq \epsilon$ , and bounded  $\epsilon_{\mu}$ . By plugging these terms into the  
 279 result of Theorem 1, we have the following bound:

$$v_M^{\mu} - v_M^{\hat{\pi}_t} \leq \frac{4C}{(1 - \gamma)^3} \left( \sqrt{\frac{419V_{\max}^2 (|\mathcal{S}| \ln |\mathcal{A}| + |\mathcal{S}||\mathcal{A}| \ln(1 + V_{\max}/\epsilon) + \ln(1/\delta))}{3n}} + 2\sqrt{\epsilon} \right) \\ + \frac{6CV_{\max}}{(1 - \gamma)^3} \left( \sqrt{\frac{|\mathcal{S}||\mathcal{A}| \ln(2|\mathcal{S}||\mathcal{A}|/\delta)}{2n}} + \frac{2|\mathcal{S}||\mathcal{A}| \ln(2|\mathcal{S}||\mathcal{A}|/\delta)}{n} \right) + \frac{3\gamma^{K-1}V_{\max}}{(1 - \gamma)^2}, \quad (106)$$

280 for any chosen  $\epsilon > 0$ . So we can set that  $\epsilon = 1/n$  to upper bound the the infimum of this upper  
 281 bound.

$$v_M^{\mu} - v_M^{\hat{\pi}_t} \leq \frac{4C}{(1 - \gamma)^3} \left( \sqrt{\frac{419V_{\max}^2 (|\mathcal{S}| \ln |\mathcal{A}| + |\mathcal{S}||\mathcal{A}| \ln(1 + nV_{\max}) + \ln(1/\delta))}{3n}} + 2\sqrt{\frac{1}{n}} \right) \\ + \frac{6CV_{\max}}{(1 - \gamma)^3} \left( \sqrt{\frac{|\mathcal{S}||\mathcal{A}| \ln(2|\mathcal{S}||\mathcal{A}|/\delta)}{2n}} + \frac{2|\mathcal{S}||\mathcal{A}| \ln(2|\mathcal{S}||\mathcal{A}|/\delta)}{n} \right) + \frac{3\gamma^{K-1}V_{\max}}{(1 - \gamma)^2} \quad (107)$$

282 Notice that in discrete space we have that  $U \leq 1$ . By replacing  $C$  with  $1/b$  and simplify some terms,  
 283 we have that:

$$v_M^{\mu} - v_M^{\hat{\pi}_t} \leq \sqrt{\frac{6704V_{\max}^2 |\mathcal{S}| (\ln(|\mathcal{A}|/\delta) + |\mathcal{A}| \ln(1 + nV_{\max}))}{3nb^2(1 - \gamma)^6}} + \frac{8}{b\sqrt{n}(1 - \gamma)^3} \\ + \sqrt{\frac{18V_{\max}^2 |\mathcal{S}||\mathcal{A}| \ln(2|\mathcal{S}||\mathcal{A}|/\delta)}{nb^2(1 - \gamma)^6}} + \frac{12V_{\max} |\mathcal{S}||\mathcal{A}| \ln(2|\mathcal{S}||\mathcal{A}|/\delta)}{nb(1 - \gamma)^3} + \frac{3\gamma^{K-1}V_{\max}}{(1 - \gamma)^2} \\ \leq \frac{52V_{\max} \sqrt{|\mathcal{S}||\mathcal{A}| (\sqrt{\ln(2|\mathcal{S}||\mathcal{A}|/\delta)} + \sqrt{\ln(1 + nV_{\max}))}}}{\sqrt{nb}(1 - \gamma)^3} + 8 \\ + \frac{12V_{\max} |\mathcal{S}||\mathcal{A}| \ln(2|\mathcal{S}||\mathcal{A}|/\delta)}{nb(1 - \gamma)^3} + \frac{3\gamma^{K-1}V_{\max}}{(1 - \gamma)^2}$$

284

□



## 285 D Proofs for $Q$ Iteration Guarantees

286 In this section, we are going to prove our main result for the  $Q$  iteration algorithm, Algorithm 2.  
 287 First we introduce a similar completeness assumption about the Bellman optimality operator:

288 **Assumption 5** (Completeness under  $\mathcal{T}_\zeta$ ).  $\max_{f \in \mathcal{F}} \min_{g \in \mathcal{F}} \|g - \mathcal{T}_\zeta f\|_{2,\mu}^2 \leq \epsilon_{\mathcal{F}}$

289 We will first state our main theorem here and then give a proof sketch before we start the proof  
 290 formally.

291 **Theorem 4.** *Given a MDP  $M = \langle \mathcal{S}, \mathcal{A}, R, P, \gamma, p \rangle$ , a dataset  $D = \{(s, a, r, s')\}$  with  $n$  samples  
 292 that is drawn i.i.d. from  $\mu \times R \times P$ , and a finite  $Q$ -function classes  $\mathcal{F}$  satisfying Assumption 5,  $\hat{\pi}_t$   
 293 from Algorithm 2 satisfies that with probability at least  $1 - \delta$ ,  $v^{\tilde{\pi}} - v^{\hat{\pi}_t} \leq$*

$$\frac{2C}{(1-\gamma)^2} \left( \sqrt{\frac{208V_{\max}^2 \ln \frac{|\mathcal{F}|}{\delta}}{3n}} + 2\sqrt{\epsilon_{\mathcal{F}}} + V_{\max}\epsilon_{\mu} + \|Q^{\tilde{\pi}} - \mathcal{T}_\zeta Q^{\tilde{\pi}}\|_{2,\mu} \right) + \frac{(2\gamma^t + \epsilon_\zeta)V_{\max}}{1-\gamma}$$

294 for any policy  $\tilde{\pi} \in \Pi_C^{all}$ .

295 We will first give a proof sketch before we start the proof formally. The proof follows a similar  
 296 structural as the policy iteration case. To prove Theorem 4 we first prove a similar version of Theo-  
 297 rem 4 but the comparator policies are in strong  $\zeta$ -constrained policy set (formally stated as Theorem  
 298 5 later). Then we show an upper bound of  $v_{M'}^{\pi} - v_{M'}^{\pi_t}$ , where  $\pi \in \Pi_{SC}^{all}$  and  $\pi_t$  is the output of  
 299 algorithm (Theorem 5, will be formally stated later). Then we are going to show that for any policy  
 300  $\pi$  in the  $\zeta$ -constrained policy set, after a projection  $\Xi$  it is in the strong  $\zeta$ -constrained policy set and  
 301  $v_M^{\pi} \leq v_{M'}^{\Xi(\pi)} + V_{\max}\epsilon_\zeta/(1-\gamma)$ . Then we can provide the upper bound for  $v_M^{\pi} - v_M^{\pi_t}$  for any  $\pi$  in  
 302  $\zeta$ -constrained policy set (Theorem 4).

The proof sketch of Theorem 5 goes as follow. One key step to prove this error bound is to convert  
 the performance difference between any policy  $\tilde{\pi} \in \Pi_{SC}^{all}$  and  $\pi_t$  to a value function gap that is  
 filtered by  $\zeta$ :

$$v^{\tilde{\pi}} - v^{\pi_t} \leq \|\zeta(Q^{\tilde{\pi}} - f_t)\|_{1,\nu_1}/(1-\gamma),$$

303 where  $\nu_1$  is some admissible distribution over  $\mathcal{S} \times \mathcal{A}$ . The filter  $\zeta$  allows the change of measure from  
 304  $\nu_1$  to  $\mu$  without constraining the density ratio between an arbitrary distribution  $\nu$  and  $\mu$ . Instead for  
 305 any  $s, a$  where  $\zeta$  is one, by definition  $\mu$  is lower bounded and the density ratio is bounded by  $C$   
 306 (details in Lemma 13).

307 The rest of the proof has a similar structure with the standard FQI analysis. In Lemma 15, we bound  
 308 the norm  $\|\zeta(Q^{\tilde{\pi}} - f_t)\|_{2,\nu_1}$  by  $C\|(f_t - \mathcal{T}_\zeta f_t)\|_{2,\mu}/(1-\gamma)$  and one additional sub-optimality error  
 309  $\|Q^{\tilde{\pi}} - \mathcal{T}_\zeta Q^{\tilde{\pi}}\|_{2,\mu}$ . The additional sub-optimality error term comes from the fact that  $\tilde{\pi}$  may not be  
 310 an optimal policy since the optimal policy may not be a  $\zeta$ -constrained policy. The last step to finish  
 311 the proof is to bound the expected Bellman residual by concentration inequality. Lemma 16 shows  
 312 how to bound that following a similar approach as [1]. Then the main theorem is proved by combine  
 313 all those steps. After that we prove when we can bound the value gap with respect to optimal value  
 314 in Corollary 4.

315 Now we start the proof. We are going to condition on the high probability bounds in Assumption 2  
 316 holds when we proof the lemmas.

**Lemma 13.** *For  $\pi_t = \Xi(\hat{\pi}_t)$  in Algorithm 2, for any policy  $\tilde{\pi} \in \Pi_{SC}^{all}$  we have*

$$v^{\tilde{\pi}} - v^{\pi_t} \leq \sum_{h=0}^{\infty} \gamma^h \left( \|\zeta(Q^{\tilde{\pi}} - f_t)\|_{1,\eta_h^{\pi_t} \times \tilde{\pi}} + \|\zeta(Q^{\tilde{\pi}} - f_t)\|_{1,\eta_h^{\tilde{\pi}} \times \pi_t} \right).$$

317 *Proof.* Given a deterministic greedy policy  $\hat{\pi}_t$ ,  $\pi_t = \Xi(\hat{\pi}_t)$  is also a deterministic policy and  
 318  $\pi_t(s)$  equals  $\hat{\pi}_t(s)$  unless  $\zeta(s, \hat{\pi}_t(s)) = 0$ , where  $\pi_t(s) = a_{\text{abs}}$ . Notice  $\hat{\pi}_t(s)$  is the maximizer  
 319 of  $\zeta(s, \cdot)f_t(s, \cdot)$ . If  $\zeta(s, \hat{\pi}_t(s)) = 0$  then  $\zeta(s, a)f_t(s, a) = 0$  for all  $a$ . We have that  $\pi_t(s)$  is also the

320 maximizer of  $\zeta(s, \cdot) f_t(s, \cdot)$ .

$$v^{\tilde{\pi}} - v^{\pi_t} = \sum_{h=0}^{\infty} \gamma^h \mathbb{E}_{s \sim \eta_h^{\pi_t}} [Q^{\tilde{\pi}}(s, \tilde{\pi}) - Q^{\tilde{\pi}}(s, \pi_t)] \quad ([3, \text{Lemma 6.1}])$$

$$\leq \sum_{h=0}^{\infty} \gamma^h \mathbb{E}_{s \sim \eta_h^{\pi_t}} \left[ \zeta(s, \tilde{\pi}) Q^{\tilde{\pi}}(s, \tilde{\pi}) - \zeta(s, \pi_t) Q^{\tilde{\pi}}(s, \pi_t) \right] \quad (108)$$

$$\leq \sum_{h=0}^{\infty} \gamma^h \mathbb{E}_{s \sim \eta_h^{\pi_t}} \left[ \zeta(s, \tilde{\pi}) Q^{\tilde{\pi}}(s, \tilde{\pi}) - \zeta(s, \tilde{\pi}) f_t(s, \tilde{\pi}) + \zeta(s, \pi_t) f_t(s, \pi_t) - \zeta(s, \pi_t) Q^{\tilde{\pi}}(s, \pi_t) \right] \quad (109)$$

$$\leq \sum_{h=0}^{\infty} \gamma^h \left( \left\| \zeta(Q^{\tilde{\pi}} - f_t) \right\|_{1, \eta_h^{\pi_t} \times \tilde{\pi}} + \left\| \zeta(Q^{\tilde{\pi}} - f_t) \right\|_{1, \eta_h^{\pi_t} \times \pi_t} \right) \quad (110)$$

321 Equation (108) follows from the fact that for all  $s, a$  such that  $\tilde{\pi}(a|s) > 0$ , either  $\zeta(s, a) = 1$ , or  
 322  $a = a_{\text{abs}}$ .  $a = a_{\text{abs}}$  indicates that  $Q^{\tilde{\pi}}(s, a) = 0$ . So for all  $s, a$  such that  $\tilde{\pi}(a|s) > 0$ ,  $Q^{\tilde{\pi}}(s, a) =$   
 323  $\zeta(s, a) Q^{\tilde{\pi}}(s, a)$ . The second part follows from that for any  $s, a$ ,  $Q^{\tilde{\pi}}(s, a) \geq \zeta(s, a) Q^{\tilde{\pi}}(s, a)$ . Equa-  
 324 tion (109) follows from the fact that  $\pi_t(s)$  is the maximizer of  $\zeta(s, \cdot) f_t(s, \cdot)$ .  $\square$

**Lemma 14.** For any two function  $f_1, f_2 : \mathcal{S}' \times \mathcal{A}' \rightarrow \mathbb{R}^+$ , define  $\pi_{f_1, f_2}(s) = \arg \max_{a \in \mathcal{A}} |f_1(s, a) - f_2(s, a)|$ . Then we have  $\forall \nu : \mathcal{S}' \rightarrow \Delta(\mathcal{A}')$ ,

$$\left\| \max_{a \in \mathcal{A}} f_1 - \max_{a \in \mathcal{A}} f_2 \right\|_{1, P(\nu)} \leq \|f_1 - f_2\|_{1, P(\nu) \times \pi_{f_1, f_2}}.$$

*Proof.*

$$\begin{aligned} \left\| \max_{a \in \mathcal{A}} f_1 - \max_{a \in \mathcal{A}} f_2 \right\|_{1, P(\nu)} &= \mathbb{E}_{s \sim P(\nu)} \left| \max_{a \in \mathcal{A}} f_1(s, a) - \max_{a \in \mathcal{A}} f_2(s, a) \right| \\ &\leq \mathbb{E}_{s \sim P(\nu)} \max_{a \in \mathcal{A}} |f_1(s, a) - f_2(s, a)| \\ &= \mathbb{E}_{s \sim P(\nu), a \sim \pi_{f_1, f_2}} |f_1(s, a) - f_2(s, a)| \\ &= \|f_1 - f_2\|_{1, P(\nu) \times \pi_{f_1, f_2}}^2. \end{aligned}$$

325  $\square$

326 **Lemma 15.** For the data distribution  $\mu$  and any admissible distribution  $\nu$  over  $\mathcal{S}' \times \mathcal{A}'$ ,  $f, f' : \mathcal{S} \times \mathcal{A} \rightarrow \mathbb{R}^+$  and any  $\tilde{\pi} \in \Pi_{\mathcal{S}\mathcal{C}}^{\text{all}}$ , we have

$$\begin{aligned} \left\| \zeta(f - Q^{\tilde{\pi}}) \right\|_{1, \nu} &\leq C \left( \|f - \mathcal{T}_{\zeta} f'\|_{2, \mu} + \left\| \mathcal{T}_{\zeta} Q^{\tilde{\pi}} - Q^{\tilde{\pi}} \right\|_{2, \mu} + V_{\max} \epsilon_{\mu} \right) \\ &\quad + \gamma \left\| \zeta(f' - Q^{\tilde{\pi}}) \right\|_{2, P(\nu) \times \pi_{\zeta f', \zeta Q^{\tilde{\pi}}}}. \end{aligned}$$

*Proof.*

$$\left\| \zeta \left( f - Q^{\tilde{\pi}} \right) \right\|_{1,\nu} \quad (111)$$

$$= \left\| \zeta \left( f - \mathcal{T}_\zeta f' + \mathcal{T}_\zeta f' - \mathcal{T}_\zeta Q^{\tilde{\pi}} + \mathcal{T}_\zeta Q^{\tilde{\pi}} - Q^{\tilde{\pi}} \right) \right\|_{1,\nu} \quad (112)$$

$$\leq \left\| \zeta \left( f - \mathcal{T}_\zeta f' \right) \right\|_{1,\nu} + \left\| \zeta \left( \mathcal{T}_\zeta f' - \mathcal{T}_\zeta Q^{\tilde{\pi}} \right) \right\|_{1,\nu} + \left\| \zeta \left( \mathcal{T}_\zeta Q^{\tilde{\pi}} - Q^{\tilde{\pi}} \right) \right\|_{1,\nu} \quad (113)$$

$$\leq C \left\| f - \mathcal{T}_\zeta f' \right\|_{1,\hat{\mu}} + \gamma \left\| \max_{a \in \mathcal{A}} \zeta f' - \max_{a \in \mathcal{A}} \zeta Q^{\tilde{\pi}} \right\|_{1,P(\nu)} + C \left\| \mathcal{T}_\zeta Q^{\tilde{\pi}} - Q^{\tilde{\pi}} \right\|_{1,\hat{\mu}} \quad (114)$$

$$\leq 2CV_{\max} \epsilon_\mu + C \left\| f - \mathcal{T}_\zeta f' \right\|_{1,\mu} + \gamma \left\| \max_{a \in \mathcal{A}} \zeta f' - \max_{a \in \mathcal{A}} \zeta Q^{\tilde{\pi}} \right\|_{1,P(\nu)} + C \left\| \mathcal{T}_\zeta Q^{\tilde{\pi}} - Q^{\tilde{\pi}} \right\|_{1,\mu} \quad (115)$$

$$\leq C \left( \left\| f - \mathcal{T}_\zeta f' \right\|_{2,\mu} + \left\| \mathcal{T}_\zeta Q^{\tilde{\pi}} - Q^{\tilde{\pi}} \right\|_{1,\mu} + 2V_{\max} \epsilon_\mu \right) + \gamma \left\| \zeta \left( f' - Q^{\tilde{\pi}} \right) \right\|_{1,P(\nu) \times \pi_{\zeta f', \zeta Q^{\tilde{\pi}}}} \quad (116)$$

328 The change of norms from  $\| \cdot \|_\nu$  to  $\| \cdot \|_\mu$  follows from that  $\zeta(s, a) \neq 0$  iff  $\hat{\mu}(s, a) \geq b$  and thus  
 329  $\nu(s, a) \leq \hat{\mu}(s, a)U/b = C\hat{\mu}(s, a)$ . The last step follows from Lemma 14.  $\left\| \zeta \left( \mathcal{T}_\zeta f' - \mathcal{T}_\zeta Q^{\tilde{\pi}} \right) \right\|_{1,\nu} \leq$   
 330  $\gamma \left\| \max_{a \in \mathcal{A}} \zeta f' - \max_{a \in \mathcal{A}} \zeta Q^{\tilde{\pi}} \right\|_{1,P(\nu)}$  follows from:

$$\left\| \zeta \left( \mathcal{T}_\zeta f' - \mathcal{T}_\zeta Q^{\tilde{\pi}} \right) \right\|_{1,\nu} = \mathbb{E}_{(s,a) \sim \nu} \left[ \zeta(s, a) \left| \mathcal{T}_\zeta f'(s, a) - \mathcal{T}_\zeta Q^{\tilde{\pi}}(s, a) \right| \right] \quad (117)$$

$$\leq \mathbb{E}_{(s,a) \sim \nu} \left[ \left| \mathcal{T}_\zeta f'(s, a) - \mathcal{T}_\zeta Q^{\tilde{\pi}}(s, a) \right| \right] \quad (118)$$

$$= \mathbb{E}_{(s,a) \sim \nu} \left[ \left| \gamma \mathbb{E}_{s' \sim P(s,a)} \max_{a' \in \mathcal{A}} \zeta(s', a') f'(s', a') - \max_{a' \in \mathcal{A}} \zeta(s', a') Q^{\tilde{\pi}}(s', a') \right| \right] \quad (119)$$

$$\leq \gamma \mathbb{E}_{(s,a) \sim \nu, s' \sim P(s,a)} \left[ \left| \max_{a' \in \mathcal{A}} \zeta(s', a') f'(s', a') - \max_{a' \in \mathcal{A}} \zeta(s', a') Q^{\tilde{\pi}}(s', a') \right| \right] \quad (Jensen)$$

$$= \gamma \mathbb{E}_{s' \sim P(\nu)} \left[ \left| \max_{a' \in \mathcal{A}} \zeta(s', a') f'(s', a') - \max_{a' \in \mathcal{A}} \zeta(s', a') Q^{\tilde{\pi}}(s', a') \right| \right] \quad (120)$$

$$= \gamma \left\| \max_{a \in \mathcal{A}} \zeta f' - \max_{a \in \mathcal{A}} \zeta Q^{\tilde{\pi}} \right\|_{1,P(\nu)} \quad (121)$$

331

□

332 Now we are going to use Bernstein's inequality to bound  $\|f_{t+1} - \mathcal{T}_\zeta f_t\|_{2,\mu}$ , which mostly follows  
 333 from [1]'s proof for the vanilla value iteration.

334 **Lemma 16.** *With Assumption 5 holds, let  $g_f^* = \arg \min_{g \in \mathcal{F}} \|g - \mathcal{T}_\zeta f\|_{2,\mu}$ , then  $\|g_f^* - \mathcal{T}_\zeta f\|_{2,\mu}^2 \leq \epsilon_{\mathcal{F}}$ .  
 335 The dataset  $D$  is generated i.i.d. from  $M$  as follows:  $(s, a) \sim \mu$ ,  $r = R(s, a)$ ,  $s' \sim P(s, a)$ . Define  
 336  $\mathcal{L}_\mu(f; f') = \mathbb{E}[\mathcal{L}_D(f; f')]$ . We have that  $\forall f \in \mathcal{F}$ , with probability at least  $1 - \delta$ ,*

$$\mathcal{L}_\mu(\mathcal{T}_{\zeta,D} f; f) - \mathcal{L}_\mu(g_f^*; f) \leq \frac{208V_{\max}^2 \ln \frac{|\mathcal{F}|}{\delta}}{3n} + \epsilon_{\mathcal{F}}$$

337 where  $\mathcal{T}_{\zeta,D} f = \arg \min_{g \in \mathcal{F}} \mathcal{L}_D(g, f)$ .

338 *Proof.* This proof is similar with the proof of Lemma 7, and we adapt it to operator  $\mathcal{T}_\zeta$ . The only  
 339 change is the definition of  $V_f(\cdot)$  and  $X(\cdot, \cdot, \cdot)$ . The definition of  $\mathcal{L}_D$  and  $\mathcal{L}_\mu$  would not change  
 340 between  $M$  and  $M'$ , and the right hand side is also the same constant for  $M$  and  $M'$ . So the result  
 341 we prove here does not change from  $M$  to  $M'$ .

For the simplicity of notations, let  $V_f(s) = \max_{a \in \mathcal{A}} \zeta(s, a) f(s, a)$ . Fix  $f, g \in \mathcal{F}$ , and define

$$X(g, f, g_f^*) := (g(s, a) - r - \gamma V_f(s'))^2 - (g_f^*(s, a) - r - \gamma V_f(s'))^2.$$

Plugging each  $(s, a, r, s') \in D$  into  $X(g, f, g_f^*)$ , we get i.i.d. variables  $X_1(g, f, g_f^*), X_2(g, f, g_f^*), \dots, X_n(g, f, g_f^*)$ . It is easy to see that

$$\frac{1}{n} \sum_{i=1}^n X_i(g, f, g_f^*) = \mathcal{L}_D(g; f) - \mathcal{L}_D(g_f^*; f).$$

By the definition of  $\mathcal{L}_\mu$ , it is also easy to see that

$$\mathcal{L}_\mu(g; f) = \|g - \mathcal{T}_\zeta f\|_{2,\mu}^2 + \mathbb{E}_{s,a \sim \mu} \left[ \mathbb{V}_{r,s'} \left( r + \gamma \max_{a' \in \mathcal{A}} \zeta(s', a') f(s', a') \right) \right]$$

Notice that the second part does not depend on  $g$ . Then

$$\mathcal{L}_\mu(g; f) - \mathcal{L}_\mu(\mathcal{T}_\zeta f; f) = \|g - \mathcal{T}_\zeta f\|_{2,\mu}^2$$

342 Then we bound the variance of  $X$ :

$$\begin{aligned} \mathbb{V}[X(g, f, g_f^*)] &\leq \mathbb{E}[X(g, f, g_f^*)^2] \\ &= \mathbb{E}_\mu \left[ \left( (g(s, a) - r - \gamma V_f(s'))^2 - (g_f^*(s, a) - r - \gamma V_f(s'))^2 \right)^2 \right] \\ &= \mathbb{E}_\mu \left[ (g(s, a) - g_f^*(s, a))^2 (g(s, a) + g_f^*(s, a) - 2r - 2\gamma V_f(s'))^2 \right] \\ &\leq 4V_{\max}^2 \mathbb{E}_\mu \left[ (g(s, a) - g_f^*(s, a))^2 \right] \\ &= 4V_{\max}^2 \|g - g_f^*\|_{2,\mu}^2 \tag{122} \\ &\leq 8V_{\max}^2 (\mathbb{E}[X(g, f, g_f^*)] + 2\epsilon_{\mathcal{F}}). \tag{*} \end{aligned}$$

343 Step (\*) holds because

$$\begin{aligned} &\|g - g_f^*\|_{2,\mu}^2 \\ &\leq 2 (\|g - \mathcal{T}_\zeta f\|_{2,\mu}^2 + \|\mathcal{T}_\zeta f - g_f^*\|_{2,\mu}^2) \tag{((a+b)^2 \leq 2a^2 + 2b^2)} \\ &\leq 2 (\|g - \mathcal{T}_\zeta f\|_{2,\mu}^2 - \|\mathcal{T}_\zeta f - g_f^*\|_{2,\mu}^2 + 2\|\mathcal{T}_\zeta f - g_f^*\|_{2,\mu}^2) \\ &= 2 [(\mathcal{L}_\mu(g; f) - \mathcal{L}_\mu(\mathcal{T}_\zeta f; f)) - (\mathcal{L}_\mu(g_f^*; f) - \mathcal{L}_\mu(\mathcal{T}_\zeta f; f)) + 2\|\mathcal{T}_\zeta f - g_f^*\|_{2,\mu}^2] \\ &= 2 [(\mathcal{L}_\mu(g; f) - \mathcal{L}_\mu(g_f^*; f)) + 2\|\mathcal{T}_\zeta f - g_f^*\|_{2,\mu}^2] \\ &= 2 (\mathbb{E}[X(g, f, g_f^*)] + 2\|\mathcal{T}_\zeta f - g_f^*\|_{2,\mu}^2) \\ &\leq 2(\mathbb{E}[X(g, f, g_f^*)] + 2\epsilon_{\mathcal{F}}) \end{aligned}$$

344 Next, we apply (one-sided) Bernstein's inequality and union bound over all  $f \in \mathcal{F}$  and  $g \in \mathcal{F}$ . With  
345 probability at least  $1 - \delta$ , we have

$$\begin{aligned} \mathbb{E}[X(g, f, g_f^*)] - \frac{1}{n} \sum_{i=1}^n X_i(g, f, g_f^*) &\leq \sqrt{\frac{2\mathbb{V}[X(g, f, g_f^*)] \ln \frac{|\mathcal{F}|^2}{\delta}}{n}} + \frac{4V_{\max}^2 \ln \frac{|\mathcal{F}|^2}{\delta}}{3n} \\ &= \sqrt{\frac{32V_{\max}^2 (\mathbb{E}[X(g, f, g_f^*)] + 2\epsilon_{\mathcal{F}}) \ln \frac{|\mathcal{F}|}{\delta}}{n}} + \frac{8V_{\max}^2 \ln \frac{|\mathcal{F}|}{\delta}}{3n} \end{aligned}$$

Since  $\mathcal{T}_{\zeta, D} f$  minimizes  $\mathcal{L}_D(\cdot; f)$ , it also minimizes  $\frac{1}{n} \sum_{i=1}^n X_i(\cdot, f, g_f^*)$ . This is because the two objectives only differ by a constant  $\mathcal{L}_D(g_f^*; f)$ . Hence,

$$\frac{1}{n} \sum_{i=1}^n X_i(\mathcal{T}_{\zeta, D} f, f, g_f^*) \leq \frac{1}{n} \sum_{i=1}^n X_i(g_f^*, f, g_f^*) = 0.$$

346 Then,

$$\mathbb{E}[X(\mathcal{T}_{\zeta, D} f, f, g_f^*)] \leq \sqrt{\frac{32V_{\max}^2 (\mathbb{E}[X(\mathcal{T}_{\zeta, D} f, f, g_f^*)] + 2\epsilon_{\mathcal{F}}) \ln \frac{|\mathcal{F}|}{\delta}}{n}} + \frac{8V_{\max}^2 \ln \frac{|\mathcal{F}|}{\delta}}{3n}.$$

347 Solving for the quadratic formula,

$$\begin{aligned}
\mathbb{E}[X(\mathcal{T}_{\zeta, D} f, f, g_f^*)] &\leq \sqrt{48 \left( \frac{8V_{\max}^2 \ln \frac{|\mathcal{F}|}{\delta}}{3n} \right)^2 + \frac{64V_{\max}^2 \ln \frac{|\mathcal{F}|}{\delta}}{n} \epsilon_{\mathcal{F}} + \frac{56V_{\max}^2 \ln \frac{|\mathcal{F}|}{\delta}}{3n}} \\
&\leq \frac{(56 + 32\sqrt{3})V_{\max}^2 \ln \frac{|\mathcal{F}|}{\delta}}{3n} + \sqrt{\frac{64V_{\max}^2 \ln \frac{|\mathcal{F}|}{\delta}}{n} \epsilon_{\mathcal{F}}} \\
&\quad (\sqrt{a+b} \leq \sqrt{a} + \sqrt{b} \text{ and } \ln \frac{|\mathcal{F}|}{\delta} > 0) \\
&\leq \frac{112V_{\max}^2 \ln \frac{|\mathcal{F}|}{\delta}}{3n} + \sqrt{\frac{64V_{\max}^2 \ln \frac{|\mathcal{F}|}{\delta}}{n} \epsilon_{\mathcal{F}}} \\
&\leq \frac{112V_{\max}^2 \ln \frac{|\mathcal{F}|}{\delta}}{3n} + \frac{32V_{\max}^2 \ln \frac{|\mathcal{F}|}{\delta}}{n} + \epsilon_{\mathcal{F}} \\
&\leq \frac{208V_{\max}^2 \ln \frac{|\mathcal{F}|}{\delta}}{3n} + \epsilon_{\mathcal{F}}
\end{aligned}$$

348 Noticing that  $\mathbb{E}[X(\mathcal{T}_{\zeta, D} f; f, g_f^*)] = \mathcal{L}_{\mu}(\mathcal{T}_{\zeta, D} f; f) - \mathcal{L}_{\mu}(g_f^*; f)$ , we complete the proof.  $\square$

349 Now we could prove the main theorem about fitted Q iteration.

350 **Theorem 5.** Given a MDP  $M = \langle \mathcal{S}, \mathcal{A}, R, P, \gamma, p \rangle$ , a dataset  $D = \{(s, a, r, s')\}$  with  $n$  samples  
351 that is draw i.i.d. from  $\mu \times R \times P$ , and a finite Q-function classes  $\mathcal{F}$  satisfying Assumption 5,  
352  $\pi_t = \Xi(\hat{\pi}_t)$  from Algorithm 2 satisfies that with probability at least  $1 - 2\delta$ ,  $v^{\tilde{\pi}} - v^{\pi_t} \leq$

$$\frac{2C}{(1-\gamma)^2} \left( \sqrt{\frac{208V_{\max}^2 \ln \frac{|\mathcal{F}|}{\delta}}{3n}} + 2\sqrt{\epsilon_{\mathcal{F}}} + V_{\max}\epsilon_{\mu} + \|Q^{\tilde{\pi}} - \mathcal{T}_{\zeta}Q^{\tilde{\pi}}\|_{1, \mu} \right) + \frac{2\gamma^t V_{\max}}{1-\gamma}$$

353 for any policy  $\tilde{\pi} \in \Pi_{SC}^{all}$ .

*Proof.* Firstly, we can let  $f = f_t$  and  $f' = f_{t-1}$  in Lemma 15. This gives us that

$$\|f_t - Q^{\tilde{\pi}}\|_{1, \nu} \leq C \left( \|f_t - \mathcal{T}_{\zeta}f_{t-1}\|_{2, \mu} + \|Q^{\tilde{\pi}} - \mathcal{T}_{\zeta}Q^{\tilde{\pi}}\|_{1, \mu} + 2V_{\max}\epsilon_{\mu} \right) + \gamma \|f_{t-1} - Q^{\tilde{\pi}}\|_{1, P(\nu) \times \pi_{f_{t-1}, Q^{\tilde{\pi}}}}$$

354 Note that we can apply the same analysis on  $P(\nu) \times \pi_{f_{t-1}, Q^{\tilde{\pi}}}$  and expand the inequality  $t$  times. It  
355 then suffices to upper bound  $\|f_t - \mathcal{T}_{\zeta}f_{t-1}\|_{2, \mu}$ .

$$\begin{aligned}
&\|f_t - \mathcal{T}_{\zeta}f_{t-1}\|_{2, \mu}^2 \\
&= \mathcal{L}_{\mu}(f_t; f_{t-1}) - \mathcal{L}_{\mu}(\mathcal{T}_{\zeta}f_{t-1}; f_{t-1}) \quad (\text{Definition of } \mathcal{L}_{\mu}) \\
&= [\mathcal{L}_{\mu}(f_t; f_{t-1}) - \mathcal{L}_{\mu}(g_{f_{t-1}}^*; f_{t-1})] + [\mathcal{L}_{\mu}(g_{f_{t-1}}^*; f_{t-1}) - \mathcal{L}_{\mu}(\mathcal{T}_{\zeta}f_{t-1}; f_{t-1})] \\
&\leq \epsilon_4 + \|g_{f_{t-1}}^* - \mathcal{T}_{\zeta}f_{t-1}\|_{2, \mu}^2 \quad (\text{Lemma 16 and definition of } \mathcal{L}_{\mu}) \\
&\leq \epsilon_4 + \epsilon_{\mathcal{F}}. \quad (\text{Definition of } g_{Q_{k-1}}^* \text{ and Assumption 5})
\end{aligned}$$

The inequality holds with probability at least  $1 - \delta$  and  $\epsilon_4 = \frac{208V_{\max}^2 \ln \frac{|\mathcal{F}|}{\delta}}{3n} + \epsilon_{\mathcal{F}}$ . Noticing that  $\epsilon_4$  and  $\epsilon_{\mathcal{F}}$  do not depend on  $t$ , and the inequality holds simultaneously for different  $t$ , we have that

$$\|f_t - Q^{\tilde{\pi}}\|_{1, \nu} \leq \frac{1-\gamma^t}{1-\gamma} C \left( \sqrt{(\epsilon_4 + \epsilon_{\mathcal{F}})} + V_{\max}\epsilon_{\mu} + \|Q^{\tilde{\pi}} - \mathcal{T}_{\zeta}Q^{\tilde{\pi}}\|_{1, \mu} \right) + \gamma^t V_{\max}.$$

356 Applying this to Lemma 13, we have that

$$\begin{aligned}
& v^{\tilde{\pi}} - v^{\pi_t} \\
& \leq \frac{2}{1-\gamma} \left( \frac{1-\gamma^t}{1-\gamma} C \left( \sqrt{(\epsilon_4 + \epsilon_{\mathcal{F}})} + V_{\max} \epsilon_{\mu} + \left\| Q^{\tilde{\pi}} - \mathcal{T}_{\zeta} Q^{\tilde{\pi}} \right\|_{1,\mu} \right) + \gamma^t V_{\max} \right) \\
& \leq \frac{2C}{(1-\gamma)^2} \left( \sqrt{\epsilon_4 + \epsilon_{\mathcal{F}}} + V_{\max} \epsilon_{\mu} + \left\| Q^{\tilde{\pi}} - \mathcal{T}_{\zeta} Q^{\tilde{\pi}} \right\|_{1,\mu} \right) + \frac{2\gamma^t V_{\max}}{1-\gamma} \\
& \leq \frac{2C}{(1-\gamma)^2} \left( \sqrt{\frac{208V_{\max}^2 \ln \frac{|\mathcal{F}|}{\delta}}{3n}} + 2\sqrt{\epsilon_{\mathcal{F}}} + V_{\max} \epsilon_{\mu} + \left\| Q^{\tilde{\pi}} - \mathcal{T}_{\zeta} Q^{\tilde{\pi}} \right\|_{1,\mu} \right) + \frac{2\gamma^t V_{\max}}{1-\gamma}.
\end{aligned}$$

357

□

358 Now we are going to use the fact that there is an no-value-loss projection from the  $\zeta$ -constrained  
359 policy set to the strong  $\zeta$ -constrained policy set to prove an error bound w.r.t any  $\tilde{\pi} \in \Pi_C^{all}$ .

360 **Theorem 2.** Given a MDP  $M = \langle \mathcal{S}, \mathcal{A}, R, P, \gamma, p \rangle$ , a dataset  $D = \{(s, a, r, s')\}$  with  $n$  samples  
361 that is draw i.i.d. from  $\mu \times R \times P$ , and a finite  $Q$ -function classes  $\mathcal{F}$  satisfying Assumption 5,  $\hat{\pi}_t$   
362 from Algorithm 2 satisfies that with probability at least  $1 - 2\delta$ ,  $v^{\tilde{\pi}} - v^{\hat{\pi}_t} \leq$

$$\frac{2C}{(1-\gamma)^2} \left( \sqrt{\frac{208V_{\max}^2 \ln \frac{|\mathcal{F}|}{\delta}}{3n}} + 2\sqrt{\epsilon_{\mathcal{F}}} + V_{\max} \epsilon_{\mu} + \left\| Q^{\tilde{\pi}} - \mathcal{T}_{\zeta} Q^{\tilde{\pi}} \right\|_{2,\mu} \right) + \frac{(2\gamma^t + \epsilon_{\zeta})V_{\max}}{1-\gamma}$$

363 for any policy  $\tilde{\pi} \in \Pi_C^{all}$ .

364 *Proof.* The difference between this theorem and Theorem 5 is that  $\tilde{\pi}$  is in  $\Pi_C^{all}$  which is significantly  
365 larger than  $\Pi_{SC}^{all}$ .

366 This prove mimics the proof of Theorem 1. For any policy  $\tilde{\pi} \in \Pi_C^{all}$ , Lemma 3 tells that  $v_M^{\tilde{\pi}} \leq$   
367  $v_{M'}^{\Xi(\tilde{\pi})} + \frac{V_{\max} \epsilon_{\zeta}}{1-\gamma}$ . Since  $\pi_t = \Xi(\hat{\pi}_t)$ ,  $v_M^{\hat{\pi}_t} = v_{M'}^{\hat{\pi}_t} \geq v_M^{\pi_t}$ . Then  $v_M^{\tilde{\pi}} - v_M^{\hat{\pi}_t} \leq v_{M'}^{\Xi(\tilde{\pi})} - v_{M'}^{\hat{\pi}_t} + \frac{V_{\max} \epsilon_{\zeta}}{1-\gamma}$  and  
368 Theorem 5 completes the proof. □

369 **Remark:** The first term in the theorem comes from that the best policy in the  $\zeta$ -constrained policy  
370 set is not optimal. Note that the  $\zeta$ -constrained policy set does not requires any realizability to do  
371 with our function approximation but merely about the density ratio of a policy. When there is an  
372 optimal policy of  $M$  such in  $\Pi_C^{all}$ , we have the same type of bound as standard approximate value  
373 iteration analysis.

374 **Corollary 4.** If there exists an  $\pi^*$  on  $M$  such that  $\Pr(\mu(s, a) \leq 2b|\pi^*) \leq \epsilon$ . then under the condition  
375 as Theorem 4,  $\hat{\pi}_t$  from Algorithm 2 satisfies that with probability at least  $1 - 2\delta$ ,  $v_M^{\pi^*} - v_M^{\hat{\pi}_t} \leq$

$$\frac{2C}{(1-\gamma)^2} \left( \sqrt{\frac{208V_{\max}^2 \ln \frac{|\mathcal{F}|}{\delta}}{3n}} + 2\sqrt{\epsilon_{\mathcal{F}}} + V_{\max} \epsilon_{\mu} + \left\| Q^{\pi^*} - \mathcal{T}_{\zeta} Q^{\pi^*} \right\|_{2,\mu} \right) + \frac{V_{\max}(2\gamma^t + \epsilon + CU\epsilon_{\mu})}{1-\gamma}$$

376 *Proof.* The proof of  $\pi^* \in \Pi_C^{all}$  is same as the proof in Corollary 1. Then proof is finished by  
377 applying Theorem 4. □

## 378 E Details of CartPole Experiment

### 379 E.1 Full results of Discretized CartPole-v0

380 In section 6.1, we compare AVI, BCQL[2], SPIBB[4], Behavior cloning and our algorithm PQI, in  
381 CartPole-v0 with discretized state space. The data is generated by a  $\epsilon$ -greedy policy ( $\epsilon$  from 0.1 to  
382 0.9) and we report the resulting policies from different algorithm with the best hyper-parameter in  
383 each  $\epsilon$ . In this section we show the learning curve for each  $\epsilon$  and each hyper-parameter value. We  
384 run the BCQ algorithm with the threshold of  $\hat{\mu}(a|s)$  in  $\{0, 0.05, 0.1, 0.2\}$ , and we run the SPIBB

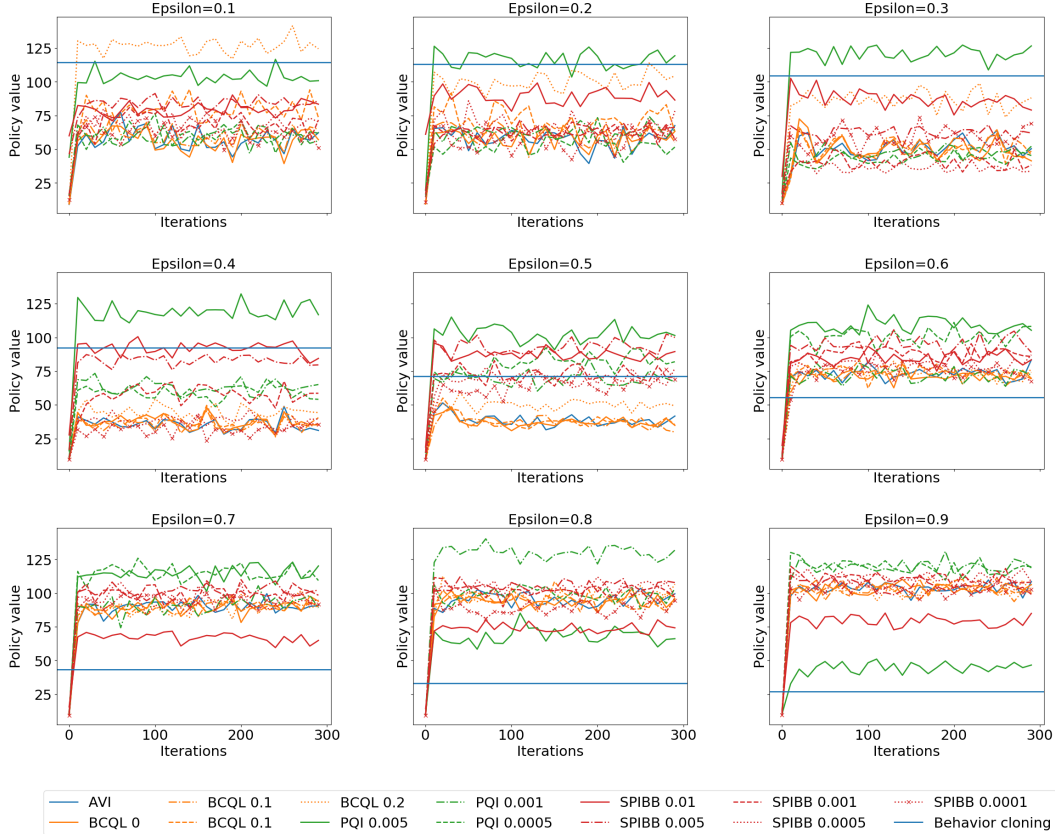

Figure 1: CartPole-v0 with discretized state space. The learning curve of all algorithms with different hyper-parameters, data generated with different  $\epsilon$ -greedy behavior policy. The hyper-parameter of SPIBB [4] and PQI is the threshold of  $\hat{\mu}(s, a)$  and the hyper-parameter of BCQL [2] is the threshold of  $\hat{\mu}(a|s)$ .

385 algorithm with the threshold of  $\hat{\mu}(s, a)$  in  $\{0.01, 0.005, 0.001, 0.0005, 0.0001\}$  and PQI with the  
 386 threshold of  $\hat{\mu}(s, a)$  in a smaller set  $\{0.005, 0.001, 0.0005\}$ . Figure 1 shows for most of the  $\epsilon$  and  
 387 threshold our algorithm tie with the best baseline (SPIBB), and the best threshold of our algorithm  
 388 outperform all baseline algorithms in 8 out of 9 cases.

389 In Figure 1, we observe the trend that smaller  $\epsilon$  will prefer a smaller  $b$ . This is verified by more  
 390 results in the next section, and we discuss the reasons for this phenomenon there.

## 391 E.2 Ablation study of threshold $b$

392 A key aspect of our algorithm is to filter the state space by a threshold on the estimated probability  
 393  $\hat{\mu}(s, a)$ . This prevents the algorithm from updating using low-confidence state, action pairs when  
 394 bootstrapping values. Then the choice of threshold  $b$  is a key trade-off in our algorithm: if  $b$  is too  
 395 small it can not remove the low-confident state, action pairs effectively; if  $b$  is too large it might  
 396 remove too many state, action pairs and prevent learning from more data. In order to demonstrate  
 397 the effect of  $b$  and how should we choose  $b$  in different settings, we show the performance of PQI in  
 398 a large range of  $b$  and several  $\epsilon$  values.

399 In figure 2 we show the trend that smaller  $b$  works better for larger  $\epsilon$  and larger  $b$  works better for  
 400 smaller  $\epsilon$  in general. This can be explained in the following way: with a larger  $\epsilon$  the data distribution  
 401 is more exploratory and hence the probabilities on individual state, action pairs are smaller. So a the  
 402 same threshold that performs well with low exploration now censors a much larger part of the state,  
 403 action space, necessitating a smaller threshold as  $\epsilon$  is increased. In general, we find that having the  
 404 largest threshold which still retains a significant fraction of the state, action space is a good heuristic  
 405 for setting the  $b$  parameter.

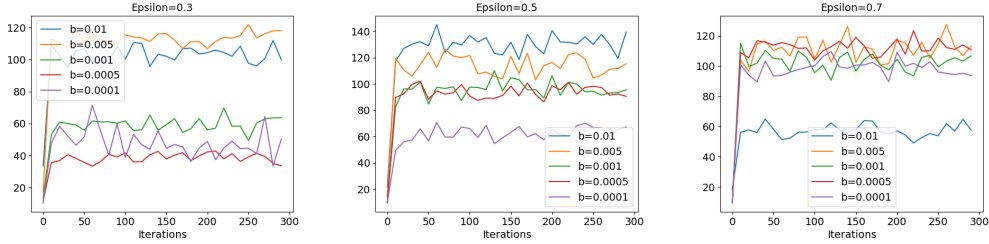

Figure 2: Performance of PQI with different values of threshold  $b$

## 406 F Details of D4RL Experiment

407 In this section we introduce some missing details about the PQL algorithm and the experimental  
 408 details in D4RL tasks. Our code is available at <https://github.com/yaoliucs/PQL>.

409 PQL algorithm is implemented based on the architecture of Batch-Constrained deep  $Q$ -learning  
 410 (BCQ) [2] algorithm. More specifically, we use the similar Clipped Double Q-Learning (CDQ) up-  
 411 date rule for the  $Q$  learning part, and employ a similar variational auto-encoder to fit the conditional  
 412 action distribution in the batch. We use an additional variational auto-encoder to fit the marginalized  
 413 state distribution of the batch. To implement an actual  $Q$  learning algorithm instead of an actor-critic  
 414 algorithm, we did not sample from the actor in the Bellman backup but sample a larger batch from  
 415 the fitted conditional action distribution. Algorithm 4 shows the pseudo-code of PQL to provide  
 416 more details. We highlight the difference with the BCQ algorithm in red.

---

### Algorithm 4 Pessimistic $Q$ -learning (PQL)

---

**Input:** Batch  $D$ , ELBO threshold  $b$ , maximum perturbation  $\Phi$ , target update rate  $\tau$ , mini-batch size  $N$ , max number of iteration  $T$ . Number of actions  $k$ .

Initialize two Q network  $Q_{\theta_1}$  and  $Q_{\theta_2}$ , policy (perturbation) model:  $\xi_\phi$ . ( $\xi_\phi \in [-\Phi, \Phi]$ ), action VAE  $G_{\omega_1}^a$  and state VAE  $G_{\omega_2}^s$ .

Pretrain  $G_{\omega_2}^s$ :  $\omega_2 \leftarrow \arg \min_{\omega_2} ELBO(B; G_{\omega_2}^s)$ .

**for**  $t = 1$  **to**  $T$  **do**

    Sample a minibatch  $B$  with  $N$  samples from  $D$ .

$\omega_1 \leftarrow \arg \min_{\omega_1} ELBO(B; G_{\omega_1}^a)$ .

**Sample  $k$  actions  $a'_i$  from  $G_{\omega_1}^a(s')$  for each  $s'$ .**

    Compute the target  $y$  for each  $(s, a, r, s')$  pair:

$$y = r + \gamma \mathbf{1}(ELBO(s'; G_{\omega_2}^s) \geq b) \left[ \max_{a'_i} \left( 0.75 * \min_{j=1,2} Q_{\theta_j} + 0.25 * \max_{j=1,2} Q_{\theta_j} \right) \right]$$

$\theta \leftarrow \arg \min_{\theta} \sum (y - Q_{\theta}(s, a))^2$

    Sample  $k$  actions  $a_i$  from  $G_{\omega_1}^a(s)$  for each  $s$ .

$\phi \leftarrow \arg \max_{\phi} \sum \max_{a_i} Q_{\theta_1}(s, a_i + \xi_\phi(s, a_i))$

    Update target network:  $\theta' = (1 - \tau)\theta' + \tau\theta$ ,  $\phi' = (1 - \tau)\phi' + \tau\phi$

**end for**

**When evaluate the resulting policy:** select action  $a = \arg \max_{a_i} Q_{\theta_1}(s, a_i + \xi_\phi(s, a_i))$  where  $a_i$  are  $k$  actions sampled from  $G_{\omega_1}^a(s)$  given  $s$ .

---

417 In practice, the indicator function  $\mathbf{1}(ELBO(s'; G_{\omega_2}^s) \geq b)$  is implemented by  
 418  $\text{sigmoid}(100(ELBO(s'; G_{\omega_2}^s) - b))$  to provide a slightly more smooth target. The evidence  
 419 lower bound (ELBO) in VAE is:

$$ELBO(s; G_{\omega_2}^s) = \sum (s - \tilde{s})^2 + D_{\text{KL}}(N(\mu, \sigma) || N(0, 1)) \quad (123)$$

420 where  $\mu$  and  $\sigma$  is sampled from the encoder of VAE with input  $s$  and  $\tilde{s}$  is sampled from the de-  
 421 coder with the hidden state generated from  $N(\mu, \sigma)$ .  $ELBO(B; G_{\omega_2}^s)$  is the averaged ELBO on the  
 422 minibatch  $B$ . So does  $G_{\omega_1}^a$ . Note that this ELBO objective make the implicit assumption that the  
 423 decoder's distribution is a Gaussian distribution with mean equals to the output of decoder network.



424 So when we generate the sample  $a'$  for computing  $y$ , we add a Gaussian noise to recover a sample  
425 from the full posterior distribution.

426 For most of the hyper-parameters in Algorithm 4, we use the same value with the BCQ algorithm.  
427 We run all algorithms with  $T = 5 \times 10^5$  gradient steps as other reported results in D4RL tasks, and  
428 the minibatch size  $N = 100$  at each step. The number of sampled action when running the policy is  
429  $k = 100$ . Target network update rate is 0.005. The threshold  $b$  of ELBO is selected as 2-percentile  
430 of the  $ELBO(s)$  in the whole dataset after pretrain the VAE.

## 431 **References**

- 432 [1] Jinglin Chen and Nan Jiang. Information-theoretic considerations in batch reinforcement learn-  
433 ing. In *ICML*, pages 1042–1051, 2019.
- 434 [2] Scott Fujimoto, David Meger, and Doina Precup. Off-policy deep reinforcement learning with-  
435 out exploration. In *ICML*, pages 2052–2062, 2019.
- 436 [3] Sham Kakade and John Langford. Approximately optimal approximate reinforcement learning.  
437 In *ICML*, pages 267–274, 2002.
- 438 [4] Romain Laroche, Paul Trichelair, and Remi Tachet Des Combes. Safe policy improvement with  
439 baseline bootstrapping. In *ICML*, pages 3652–3661, 2019.
